# Supplementary material for: Does the Neighborhood Area of Residence Influence Non-Attendance in an Urban Mammography Screening Program? A Multilevel Study in a Swedish City
Source: PubMed Central journal article supplement (PMC4604149; doi:10.1371/journal.pone.0140244), 2015-10-13
Supplement: pone.0140244.s001.pdf [file pone.0140244.s001.pdf]

# PLOS ONE

## A novel stepwise multilevel logistic regression analysis of discriminatory accuracy: the case of neighbourhoods and health --Manuscript Draft--

|                                |                                                                                                                                                                                                                                                                                                                                                                                                                                                                                                                                                                                                                                                                                                                                                                                                                                                                                                                                                                                                                                                                                                                                                                                                                                                                                                                                                                                                                                                                                                                                                                                                                                                                                                                                                                                                                                                                                                                                                                                                                                                                                                                                                                                                                                                                    |
|--------------------------------|--------------------------------------------------------------------------------------------------------------------------------------------------------------------------------------------------------------------------------------------------------------------------------------------------------------------------------------------------------------------------------------------------------------------------------------------------------------------------------------------------------------------------------------------------------------------------------------------------------------------------------------------------------------------------------------------------------------------------------------------------------------------------------------------------------------------------------------------------------------------------------------------------------------------------------------------------------------------------------------------------------------------------------------------------------------------------------------------------------------------------------------------------------------------------------------------------------------------------------------------------------------------------------------------------------------------------------------------------------------------------------------------------------------------------------------------------------------------------------------------------------------------------------------------------------------------------------------------------------------------------------------------------------------------------------------------------------------------------------------------------------------------------------------------------------------------------------------------------------------------------------------------------------------------------------------------------------------------------------------------------------------------------------------------------------------------------------------------------------------------------------------------------------------------------------------------------------------------------------------------------------------------|
| <b>Manuscript Number:</b>      | PONE-D-15-36083                                                                                                                                                                                                                                                                                                                                                                                                                                                                                                                                                                                                                                                                                                                                                                                                                                                                                                                                                                                                                                                                                                                                                                                                                                                                                                                                                                                                                                                                                                                                                                                                                                                                                                                                                                                                                                                                                                                                                                                                                                                                                                                                                                                                                                                    |
| <b>Article Type:</b>           | Research Article                                                                                                                                                                                                                                                                                                                                                                                                                                                                                                                                                                                                                                                                                                                                                                                                                                                                                                                                                                                                                                                                                                                                                                                                                                                                                                                                                                                                                                                                                                                                                                                                                                                                                                                                                                                                                                                                                                                                                                                                                                                                                                                                                                                                                                                   |
| <b>Full Title:</b>             | A novel stepwise multilevel logistic regression analysis of discriminatory accuracy: the case of neighbourhoods and health                                                                                                                                                                                                                                                                                                                                                                                                                                                                                                                                                                                                                                                                                                                                                                                                                                                                                                                                                                                                                                                                                                                                                                                                                                                                                                                                                                                                                                                                                                                                                                                                                                                                                                                                                                                                                                                                                                                                                                                                                                                                                                                                         |
| <b>Short Title:</b>            | A novel multilevel analysis of neighbourhoods and health                                                                                                                                                                                                                                                                                                                                                                                                                                                                                                                                                                                                                                                                                                                                                                                                                                                                                                                                                                                                                                                                                                                                                                                                                                                                                                                                                                                                                                                                                                                                                                                                                                                                                                                                                                                                                                                                                                                                                                                                                                                                                                                                                                                                           |
| <b>Corresponding Author:</b>   | Juan Merlo, M.D., Ph.D. Professor<br>Lund University<br>Malmö, SWEDEN                                                                                                                                                                                                                                                                                                                                                                                                                                                                                                                                                                                                                                                                                                                                                                                                                                                                                                                                                                                                                                                                                                                                                                                                                                                                                                                                                                                                                                                                                                                                                                                                                                                                                                                                                                                                                                                                                                                                                                                                                                                                                                                                                                                              |
| <b>Keywords:</b>               | Multilevel regression analysis; variance analysis; discriminatory accuracy; neighbourhood; psychotropic medication; health care utilization; geographical differences, social epidemiology; Sweden                                                                                                                                                                                                                                                                                                                                                                                                                                                                                                                                                                                                                                                                                                                                                                                                                                                                                                                                                                                                                                                                                                                                                                                                                                                                                                                                                                                                                                                                                                                                                                                                                                                                                                                                                                                                                                                                                                                                                                                                                                                                 |
| <b>Abstract:</b>               | <p><b>Background and aim:</b> Many multilevel logistic regression analyses of "neighbourhood and health" focus on interpreting measures of associations (e.g., odds ratio, OR). In contrast, multilevel analysis of variance is rarely considered. We propose a novel stepwise analytical approach that distinguishes between "specific" (measures of association) and "general" (measures of variance) contextual effects and discuss appropriate epidemiological measures for this purpose.</p> <p><b>Methods:</b> We analyse 43,291 individuals residing in 218 neighbourhoods in the city of Malmö, Sweden in 2006. We study two individual outcomes (psychotropic drug use and choice of private vs. public general practitioner, GP) for which the relative importance of neighbourhood as a source of individual variation differs substantially. In Step 1 of the analysis, we evaluate the OR and the area under the receiver operating characteristic (AU-ROC) curve for individual-level covariates. In Step 2, we assess general contextual effects using the AU-ROC. Finally, in Step 3 the OR for a specific neighbourhood characteristic (e.g., neighbourhood income) is interpreted jointly with the proportional change in variance (i.e., PCV) and the proportion of ORs in the opposite direction (POOR).</p> <p><b>Results:</b> For both outcomes, information on individual characteristics (Step 1) provide a low discriminatory accuracy (AU-ROC=0.616 for psychotropic drugs; =0.600 for choosing a private physician). Accounting for neighbourhood of residence (Step 2) only improved the AU-ROC for choosing a private physician (+0.295 units). High neighbourhood income (Step 3) was strongly associated to choosing a private physician (OR= 3.50) but the PCV was only 11% and the POOR 33%.</p> <p><b>Conclusion:</b> We develop and exemplify a novel stepwise multilevel analytical approach. We observed that the neighbourhood context in Malmö had a negligible influence on individual use of psychotropic drugs, but appears to strongly condition individual choice of a private GP. However, the reasons for this phenomenon are only partially explained by the socioeconomic circumstances of the neighbourhoods.</p> |
| <b>Order of Authors:</b>       | Juan Merlo, M.D., Ph.D. Professor<br>Philippe Wagner<br>Nermin Ghith<br>George Leckie                                                                                                                                                                                                                                                                                                                                                                                                                                                                                                                                                                                                                                                                                                                                                                                                                                                                                                                                                                                                                                                                                                                                                                                                                                                                                                                                                                                                                                                                                                                                                                                                                                                                                                                                                                                                                                                                                                                                                                                                                                                                                                                                                                              |
| <b>Opposed Reviewers:</b>      |                                                                                                                                                                                                                                                                                                                                                                                                                                                                                                                                                                                                                                                                                                                                                                                                                                                                                                                                                                                                                                                                                                                                                                                                                                                                                                                                                                                                                                                                                                                                                                                                                                                                                                                                                                                                                                                                                                                                                                                                                                                                                                                                                                                                                                                                    |
| <b>Additional Information:</b> |                                                                                                                                                                                                                                                                                                                                                                                                                                                                                                                                                                                                                                                                                                                                                                                                                                                                                                                                                                                                                                                                                                                                                                                                                                                                                                                                                                                                                                                                                                                                                                                                                                                                                                                                                                                                                                                                                                                                                                                                                                                                                                                                                                                                                                                                    |
| <b>Question</b>                | <b>Response</b>                                                                                                                                                                                                                                                                                                                                                                                                                                                                                                                                                                                                                                                                                                                                                                                                                                                                                                                                                                                                                                                                                                                                                                                                                                                                                                                                                                                                                                                                                                                                                                                                                                                                                                                                                                                                                                                                                                                                                                                                                                                                                                                                                                                                                                                    |
| <b>Financial Disclosure</b>    | Swedish Research Council (JM, 2013-2484)                                                                                                                                                                                                                                                                                                                                                                                                                                                                                                                                                                                                                                                                                                                                                                                                                                                                                                                                                                                                                                                                                                                                                                                                                                                                                                                                                                                                                                                                                                                                                                                                                                                                                                                                                                                                                                                                                                                                                                                                                                                                                                                                                                                                                           |

|                                                                                                                                                                                                                                                                                                                                                                                                                                                                                                                                                                                                                                                                                                                                                                                                                                                                                                                                                  |                                                                                                                                                                                                                                                                                          |
|--------------------------------------------------------------------------------------------------------------------------------------------------------------------------------------------------------------------------------------------------------------------------------------------------------------------------------------------------------------------------------------------------------------------------------------------------------------------------------------------------------------------------------------------------------------------------------------------------------------------------------------------------------------------------------------------------------------------------------------------------------------------------------------------------------------------------------------------------------------------------------------------------------------------------------------------------|------------------------------------------------------------------------------------------------------------------------------------------------------------------------------------------------------------------------------------------------------------------------------------------|
| <p>Please describe all sources of funding that have supported your work. A complete funding statement should do the following:</p> <p>Include <b>grant numbers and the URLs</b> of any funder's website. Use the full name, not acronyms, of funding institutions, and use initials to identify authors who received the funding.</p> <p><b>Describe the role</b> of any sponsors or funders in the study design, data collection and analysis, decision to publish, or preparation of the manuscript. If they had <b>no role</b> in any of the above, include this sentence at the end of your statement: "<i>The funders had no role in study design, data collection and analysis, decision to publish, or preparation of the manuscript.</i>"</p> <p>If the study was <b>unfunded</b>, provide a statement that clearly indicates this, for example: "<i>The author(s) received no specific funding for this work.</i>"</p> <p>* typeset</p> | <p><a href="http://www.vr.se/inenglish.4.12fff4451215cbd83e4800015152.html">http://www.vr.se/inenglish.4.12fff4451215cbd83e4800015152.html</a></p> <p>The funders had no role in study design, data collection and analysis, decision to publish, or preparation of the manuscript."</p> |
| <p><b>Competing Interests</b></p> <p>You are responsible for recognizing and disclosing on behalf of all authors any competing interest that could be perceived to bias their work, acknowledging all financial support and any other relevant financial or non-financial competing interests.</p> <p>Do any authors of this manuscript have competing interests (as described in the <a href="#">PLOS Policy on Declaration and Evaluation of Competing Interests</a>)?</p> <p><b>If yes</b>, please provide details about any and all competing interests in the box below. Your response should begin with this statement: <i>I have read the journal's policy and the authors of this manuscript have the following competing interests:</i></p> <p><b>If no</b> authors have any competing interests to declare, please enter this</p>                                                                                                      | <p>The authors have declared that no competing interests exist</p>                                                                                                                                                                                                                       |

|                                                                                                                                                                                                                                                                                                                                                                                                                                                                                                                                                                                                                                                                                                                                                                                                                                                                                                                                                                                                                                                                                                                                                                                                                                                                                                                                                                                                                                                                                                                                                                                                                                                                                                                                                                                                          |                                                                                                                                                                                                                                                                                                                                                                                                                                                                                                                                                                                                                                                                                                                                                                                                                                                 |
|----------------------------------------------------------------------------------------------------------------------------------------------------------------------------------------------------------------------------------------------------------------------------------------------------------------------------------------------------------------------------------------------------------------------------------------------------------------------------------------------------------------------------------------------------------------------------------------------------------------------------------------------------------------------------------------------------------------------------------------------------------------------------------------------------------------------------------------------------------------------------------------------------------------------------------------------------------------------------------------------------------------------------------------------------------------------------------------------------------------------------------------------------------------------------------------------------------------------------------------------------------------------------------------------------------------------------------------------------------------------------------------------------------------------------------------------------------------------------------------------------------------------------------------------------------------------------------------------------------------------------------------------------------------------------------------------------------------------------------------------------------------------------------------------------------|-------------------------------------------------------------------------------------------------------------------------------------------------------------------------------------------------------------------------------------------------------------------------------------------------------------------------------------------------------------------------------------------------------------------------------------------------------------------------------------------------------------------------------------------------------------------------------------------------------------------------------------------------------------------------------------------------------------------------------------------------------------------------------------------------------------------------------------------------|
| <p>statement in the box: "<i>The authors have declared that no competing interests exist.</i>"</p> <p>* typeset</p>                                                                                                                                                                                                                                                                                                                                                                                                                                                                                                                                                                                                                                                                                                                                                                                                                                                                                                                                                                                                                                                                                                                                                                                                                                                                                                                                                                                                                                                                                                                                                                                                                                                                                      |                                                                                                                                                                                                                                                                                                                                                                                                                                                                                                                                                                                                                                                                                                                                                                                                                                                 |
| <p><b>Ethics Statement</b></p> <p>You must provide an ethics statement if your study involved human participants, specimens or tissue samples, or vertebrate animals, embryos or tissues. All information entered here should <b>also be included in the Methods section</b> of your manuscript. Please write "N/A" if your study does not require an ethics statement.</p> <p><b>Human Subject Research (involved human participants and/or tissue)</b></p> <p>All research involving human participants must have been approved by the authors' Institutional Review Board (IRB) or an equivalent committee, and all clinical investigation must have been conducted according to the principles expressed in the <a href="#">Declaration of Helsinki</a>. Informed consent, written or oral, should also have been obtained from the participants. If no consent was given, the reason must be explained (e.g. the data were analyzed anonymously) and reported. The form of consent (written/oral), or reason for lack of consent, should be indicated in the Methods section of your manuscript.</p> <p>Please enter the name of the IRB or Ethics Committee that approved this study in the space below. Include the approval number and/or a statement indicating approval of this research.</p> <p><b>Animal Research (involved vertebrate animals, embryos or tissues)</b></p> <p>All animal work must have been conducted according to relevant national and international guidelines. If your study involved non-human primates, you must provide details regarding animal welfare and steps taken to ameliorate suffering; this is in accordance with the recommendations of the Weatherall report, "<a href="#">The use of non-human primates in research.</a>" The relevant guidelines</p> | <p>The National Board of Health and Welfare and Statistics Sweden constructed the database by means of record linkage of different registers using the unique Swedish personal identification number. Finally, the Swedish authorities delivered the research database to us without the personal identification numbers to ensure the anonymity of the subjects. The Regional Ethics Review Board in southern Sweden as well as the data safety committees from the National Board of Health and Welfare and from Statistics Sweden approved the construction of the LOMAS database.</p> <p>For the purpose of our study we created a fully anonymized sample that completely prevents the identification of individuals using a combination of variables. This fully anonymized sample is provided in the Online Supplementary Materials.</p> |

|                                                                                                                                                                                                                                                                                                                                                                                                                                                                                                                                                                                                                                                                                                                                                                                                                                                                                                                                                                                                                                                                                                                                              |                                                                                    |
|----------------------------------------------------------------------------------------------------------------------------------------------------------------------------------------------------------------------------------------------------------------------------------------------------------------------------------------------------------------------------------------------------------------------------------------------------------------------------------------------------------------------------------------------------------------------------------------------------------------------------------------------------------------------------------------------------------------------------------------------------------------------------------------------------------------------------------------------------------------------------------------------------------------------------------------------------------------------------------------------------------------------------------------------------------------------------------------------------------------------------------------------|------------------------------------------------------------------------------------|
| <p>followed and the committee that approved the study should be identified in the ethics statement.</p> <p>If anesthesia, euthanasia or any kind of animal sacrifice is part of the study, please include briefly in your statement which substances and/or methods were applied.</p> <p>Please enter the name of your Institutional Animal Care and Use Committee (IACUC) or other relevant ethics board, and indicate whether they approved this research or granted a formal waiver of ethical approval. Also include an approval number if one was obtained.</p> <p><b>Field Permit</b></p> <p>Please indicate the name of the institution or the relevant body that granted permission.</p>                                                                                                                                                                                                                                                                                                                                                                                                                                             |                                                                                    |
| <p><b>Data Availability</b></p> <p>PLOS journals require authors to make all data underlying the findings described in their manuscript fully available, without restriction and from the time of publication, with only rare exceptions to address legal and ethical concerns (see the <a href="#">PLOS Data Policy</a> and <a href="#">FAQ</a> for further details). When submitting a manuscript, authors must provide a Data Availability Statement that describes where the data underlying their manuscript can be found.</p> <p>Your answers to the following constitute your statement about data availability and will be included with the article in the event of publication. <b>Please note that simply stating 'data available on request from the author' is not acceptable. If, however, your data are only available upon request from the author(s), you must answer "No" to the first question below, and explain your exceptional situation in the text box provided.</b></p> <p>Do the authors confirm that all data underlying the findings described in their manuscript are fully available without restriction?</p> | <p>Yes - all data are fully available without restriction</p>                      |
| <p>Please describe where your data may be found, writing in full sentences. <b>Your answers should be entered into the box below and will be published in the form</b></p>                                                                                                                                                                                                                                                                                                                                                                                                                                                                                                                                                                                                                                                                                                                                                                                                                                                                                                                                                                   | <p>All relevant data are within the paper and its Supporting Information files</p> |

**you provide them, if your manuscript is accepted.** If you are copying our sample text below, please ensure you replace any instances of **XXX** with the appropriate details.

If your data are all contained within the paper and/or Supporting Information files, please state this in your answer below. For example, "All relevant data are within the paper and its Supporting Information files."

If your data are held or will be held in a public repository, include URLs, accession numbers or DOIs. For example, "All **XXX** files are available from the **XXX** database (accession number(s) **XXX**, **XXX**)." If this information will only be available after acceptance, please indicate this by ticking the box below.

If neither of these applies but you are able to provide details of access elsewhere, with or without limitations, please do so in the box below. For example:

"Data are available from the **XXX** Institutional Data Access / Ethics Committee for researchers who meet the criteria for access to confidential data."

"Data are from the **XXX** study whose authors may be contacted at **XXX**."

\* typeset

Additional data availability information:

Tick here if your circumstances are not covered by the questions above and you need the journal's help to make your data available.

Dear Editor,

An established area of research in social epidemiology and public health concerns the investigation of “neighbourhood and health” [1]. Researchers aim to identify contextual influences of the neighbourhood of one’s residence on individual health outcomes. For this purpose, multilevel analysis of variance is a fundamental methodology that allows appropriate measurement and interpretation of contextual effects [2, 3]. However, many studies continue to focus on estimating and interpreting only measures of association (e.g., odds ratios) between specific contextual characteristics and individual health outcomes [4]. Unfortunately, this may lead to incorrect inferences and, thereby, incorrect conclusions. Though, multilevel analysis of variance is technically more complex than standard analyses and this may have deterred many researchers from applying it. This research article therefore proposes an innovative and accessible three-step approach to conducting multilevel analysis of variance in neighbourhood and health studies. Our approach distinguishes between “specific” (measures of association) and “general” (measures of variance) contextual effects. We provide and compare different measures of (observational) contextual effects and introduce the area under the receiver operating characteristic curve (AU-ROC) as an intuitive measure to quantify general contextual effects.

While our contribution is fundamentally methodological, we illustrate our three-step approach by performing real empirical analyses paying special attention to describe and explain the applied methodology. Furthermore, we present our ideas in a didactic and conceptual fashion, rather than a mathematical one, in order to make our arguments and methods accessible to as broad a readership as possible.

Our team has considerable experience in the analysis and interpretation of multilevel analyses of variance and we have also published several tutorials on other aspects of multilevel modelling. We believe our study fills a gap in the current literature on multilevel analysis and it will therefore be received with interest by many researchers. We hope that our work will facilitate and improve the use and interpretation of multilevel regression analyses in Public Health which, in turn, will ultimately lead to improvements in public health practice.

Sincerely

Juan Merlo, on behalf of all the authors

1. Kawachi, I. and L. Berkman, *Neighborhoods and Health*. 2003, New York: Oxford University Press.
2. Merlo, J., *Invited commentary: multilevel analysis of individual heterogeneity-a fundamental critique of the current probabilistic risk factor epidemiology*. *American Journal of Epidemiology*, 2014. **180**(2): p. 208-12.
3. Riva, M., L. Gauvin, and T.A. Barnett, *Toward the next generation of research into small area effects on health: a synthesis of multilevel investigations published since July 1998*. *J Epidemiol Community Health*, 2007. **61**(10): p. 853-61.
4. Diez Roux, A.V., *Next steps in understanding the multilevel determinants of health*. *J Epidemiol Community Health* 1470-2738 (Electronic), 2008. **62**(11): p. 957-9.

1 A novel stepwise multilevel logistic regression analysis of discriminatory  
2 accuracy: the case of neighbourhoods and health

---

3 Short title: A novel multilevel analysis of neighbourhoods and health

4

5 Juan Merlo<sup>1</sup>, Philippe Wagner<sup>1,2</sup>, Nermin Ghith<sup>1,3</sup>, George Leckie<sup>4</sup>

6

7 <sup>1</sup>Unit for Social Epidemiology, Faculty of Medicine, Lund University, Malmö, Sweden

8 <sup>2</sup>Centre for Clinical Research Västmanland, Uppsala University, Uppsala, Sweden

9 <sup>3</sup>Research Unit of Chronic Conditions, Bispebjerg University Hospital, Copenhagen,  
10 Denmark

11 <sup>4</sup>Centre for Multilevel Modelling, University of Bristol, UK

12

13 \*Corresponding author

14 E-mail: [juan.merlo@med.lu.se](mailto:juan.merlo@med.lu.se)

15

16

# 1 Abstract

2 Background and aim: Many multilevel logistic regression analyses of “neighbourhood and  
3 health” focus on interpreting measures of associations (e.g., odds ratio, OR). In contrast,  
4 multilevel analysis of variance is rarely considered. We propose a novel stepwise analytical  
5 approach that distinguishes between “specific” (measures of association) and “general”  
6 (measures of variance) contextual effects and discuss appropriate epidemiological measures  
7 for this purpose.

8 Methods: We analyse 43,291 individuals residing in 218 neighbourhoods in the city of  
9 Malmö, Sweden in 2006. We study two individual outcomes (psychotropic drug use and  
10 choice of private vs. public general practitioner, GP) for which the relative importance of  
11 neighbourhood as a source of individual variation differs substantially. In Step 1 of the  
12 analysis, we evaluate the OR and the area under the receiver operating characteristic (AU-  
13 ROC) curve for individual-level covariates. In Step 2, we assess general contextual effects  
14 using the AU-ROC. Finally, in Step 3 the OR for a specific neighbourhood characteristic  
15 (e.g., neighbourhood income) is interpreted jointly with the proportional change in variance  
16 (i.e., PCV) and the proportion of ORs in the opposite direction (POOR).

17 Results: For both outcomes, information on individual characteristics (Step 1) provide a low  
18 discriminatory accuracy (AU-ROC=0.616 for psychotropic drugs; =0.600 for choosing a  
19 private physician). Accounting for neighbourhood of residence (Step 2) only improved the  
20 AU-ROC for choosing a private physician (+0.295 units). High neighbourhood income (Step  
21 3) was strongly associated to choosing a private physician (OR= 3.50) but the PCV was only  
22 11% and the POOR 33%.

23 Conclusion: We develop and exemplify a novel stepwise multilevel analytical approach. We  
24 observed that the neighbourhood context in Malmö had a negligible influence on individual  
25 use of psychotropic drugs, but appears to strongly condition individual choice of a private GP.  
26 However, the reasons for this phenomenon are only partially explained by the socioeconomic  
27 circumstances of the neighbourhoods.

28

29



## 1 Introduction

2 An established area of research in social epidemiology and public health concerns the  
3 investigation of “neighbourhood and health” and multilevel logistic regression analyses are  
4 frequently conducted for this purpose. Interest within neighbourhood and health studies  
5 typically lies in estimating and interpreting measures of associations (e.g., the exponentiated  
6 regression coefficients or odds ratios, OR) between specific contextual characteristics and  
7 binary measures of individual health outcomes. In other settings, researchers routinely  
8 perform analyses of small area variation which, in their simplest form, are displayed as health  
9 league tables, “heat” or choropleth maps, or atlases of geographical variation. A common  
10 denominator in all these studies is that they analyse differences between group averages. For  
11 instance, the average risk of dying among individuals living in poor neighbourhoods might be  
12 compared to the average risk of dying among individuals living in rich neighbourhoods.

13 Alternatively, statistics like indices of small area variation might be calculated to summarize  
14 the overall range or variation in group averages. All these studies disregard within-group  
15 individual-level variation in health outcomes except to estimate the statistical uncertainty  
16 around the estimated differences between group averages (1, 2).

17 In contrast, other researchers have explicitly concluded that we need to consider both  
18 differences between group averages and differences between individuals around these  
19 averages. In fact, information on individual-level variance in multilevel regression analysis  
20 provides indispensable information for understanding contextual influences on health (1-9).

21 From this perspective, knowing the proportions of overall variation in health outcomes which  
22 are attributable to the contextual-level (e.g., the neighbourhood) is of fundamental relevance  
23 for operationalizing contextual phenomena and for identifying the relevant levels of analysis  
24 (1, 3, 7, 10-14). This concept is rather intuitive when we think about the analogy between  
25 individual and collective bodies (3). Also, using Rose’s terminology (15), in order to identify

1 sick populations the simple quantification of differences between population averages of some  
2 health indicator is not appropriate. Rather, we need information on both population averages  
3 and the distribution of individual values around these averages. Through doing so, we are able  
4 to learn the share of the total outcome variance that is between population level averages so  
5 the larger this proportion, the more relevant the population level of analysis is (7). This idea  
6 corresponds well with the notion of variance partition coefficients (VPC) and the concept of  
7 clustering as measured by intraclass correlation coefficients (ICC) (12).

8 Considering these ideas, we can identify at least three different analytical approaches in social  
9 epidemiology, all of which are dedicated to the investigation of contextual influences on  
10 binary measures of individual health. The *small area variation approach* focuses on the  
11 analysis of geographic variance using aggregated geographical data often on small areas or  
12 zones at different spatial scales (16). The *multilevel analysis of associations approach*  
13 performs multilevel logistic regression analysis or similar techniques to identify average  
14 associations (e.g., ORs) between specific contextual level variables and individual health (17),  
15 adjusting for neighbourhood clustering. Finally, the *multilevel analysis of individual*  
16 *heterogeneity approach* combines both the multilevel analysis of associations for estimation  
17 of specific contextual effects and the multilevel analysis of variance (e.g., the degree of  
18 clustering, ICC) for the investigation of general contextual effects (i.e., non-specific  
19 contextual influences on health) (3) (2). The *small area variation approach* typically applied  
20 in Public Health represents a refinement of classical ecological studies on aggregated data.  
21 The *multilevel analysis of associations approach* follows the conventional approach in  
22 probabilistic risk factors epidemiology, while the *multilevel analysis of individual*  
23 *heterogeneity approach* adopts a multilevel perspective for understanding heterogeneity of  
24 individual responses around the average risk in a group (18). It is this last approach which we  
25 develop and promote in this study.

1 Interestingly, in spite of their independent origins and areas of application, the *multilevel*  
2 *analysis of individual heterogeneity approach* has many analogies with that adopted in other  
3 fields of epidemiology concerned with the identification of new candidate risk factors and  
4 biomarkers and the evaluation of diagnostic and screening test. In those research fields, it is  
5 well known that measures of average association like ORs provide limited information for  
6 gauging the performance of a diagnostic, prognostic, or screening marker (19). Accordingly,  
7 the rule is that measures of association need be interpreted together with measures of  
8 discriminatory accuracy such as net reclassification improvement (NRI), integrated  
9 discrimination improvement (IDI) (20-22) and, especially, the area under the receiver  
10 operating characteristic curve (AU-ROC) (23, 24). Analogously, the *multilevel analysis of*  
11 *individual heterogeneity approach* argues that estimates of specific contextual effects (i.e.,  
12 average measures of association) provide insufficient information if they are not accompanied  
13 by measures of general contextual effects (i.e., degree of clustering) (1, 2, 18).

14 In the *multilevel analysis of individual heterogeneity approach* the ICC for hierarchical  
15 multilevel structures (25) is a fundamental measure for quantifying general contextual effects.  
16 As a concept, the ICC (i.e., the share of the total outcome variance which lies at the context  
17 level, having adjusted for any covariates) is rather intuitive for continuous responses since the  
18 individual- and contextual-level variances are both estimated and defined on the same scale.  
19 However, the ICC proves less straightforward to understand and calculate when analysing  
20 binary responses via multilevel logistic regression because only the contextual-level variance  
21 is estimated. Furthermore, this variance is defined on the log-odds scale, rather than the binary  
22 response scale (25). Nevertheless, a range of procedures for calculating the ICC for binary  
23 responses have been proposed, including the normal approximation, the simulation method,  
24 and the Taylor series linearization, (10, 25-27). However, it is the ICC based on the latent  
25 response formulation of the model which has become most widely adopted. No doubt partly

1 due to these complications, a range of alternatives to the ICC for binary responses have also  
2 been proposed to quantify the extent of general contextual effects. These include the pairwise  
3 odds ratio (PWOR)(14) and measures of heterogeneity such as the median odds ratio  
4 (MOR)(28, 29). In any case, it is important to realize that the ICC is itself a measure of  
5 discriminatory accuracy (30, 31). Therefore, taking advantage of the analogy between the  
6 concept of discriminatory accuracy and the notion of general contextual effects, a simple but  
7 innovative approach is to express general contextual effects by means of measures of  
8 discriminatory accuracy like the AU-ROC (32, 33). The AU-ROC measure is well established  
9 among epidemiologists, public health practitioners and physicians and its computation is  
10 straightforward using standard statistical software.

11 In the current study, we present a novel three-step approach for the systematic investigation of  
12 observational multilevel (e.g., individual and neighbourhood) effects on binary measures of  
13 individual health and health care utilization, distinguishing between specific and general  
14 contextual effects. To make our approach as accessible as possible, we present a conceptual  
15 and didactic treatment of the issues rather than a technical and mathematical one. We  
16 introduce and then demonstrate the utility of AU-ROC as a measure of general contextual  
17 effects and we compare it to the ICC and the MOR. We illustrate our approach by analysing  
18 two different binary outcomes: (i) use of psychotropic medication, which is related to both  
19 psychological health and access to medication; and (ii) individual choice of a private vs. a  
20 public general practitioner (GP), which is a behavioural outcome.

## 21 Population and methods

### 22 *Study sample*

23 We drew our sample of individuals from the LOMAS (Longitudinal Multilevel Analysis in  
24 Scania) database containing anonymised data on all individuals living in the county of Scania,

1 Sweden during the years 1968-2006. The database includes geographic, demographic and  
2 socioeconomic information on all individuals as well as data on their health care and  
3 medication use (34). The sample consists of all individuals aged 35–64 years residing in the  
4 city of Malmö on 31st December 2005 (N= 99,266), who were still alive on 31st December  
5 2006 (N = 98,536). We further restricted this sample to those with at least one contact with  
6 primary health care during the year 2006 (N = 46,675) as well as residing in neighbourhoods  
7 with at least 50 people who fulfilled the same selection criteria (N = 43,588). Lastly, we  
8 dropped 297 (0.7%) individuals who had missing values for individual income. The final  
9 study sample consisted of 43,291 individuals within 218 neighbourhoods. This dataset (fully  
10 anonymized) is provided in the Online Supplementary Materials.

11 The National Board of Health and Welfare and Statistics Sweden constructed the database by  
12 means of record linkage of different registers using the unique Swedish personal identification  
13 number. Finally, the Swedish authorities delivered the research database to us without the  
14 personal identification numbers to ensure the anonymity of the subjects. The Regional Ethics  
15 Review Board in southern Sweden as well as the data safety committees from the National  
16 Board of Health and Welfare and from Statistics Sweden approved the construction of the  
17 LOMAS database.

18 For the purpose of our study we created a fully anonymized sample that completely prevents  
19 the identification of individuals using a combination of variables. This fully anonymized  
20 sample is provided in the Online Supplementary Materials.

21

## 1 *Assessment of variables*

### 2 Outcome variables

3 To illustrate our three-step approach, we carried out two empirical analyses. In the first  
4 analysis the outcome variable was defined as use (= 1) or not (= 0) of psychotropic  
5 medication during 2006. We defined psychotropic medication as Anatomical Therapeutic  
6 Chemical (ATC) Classification System (35) codes N05B (Anxiolytics), N05C (Hypnotics and  
7 sedatives) and N06A (Antidepressants). In the second analysis, the response variable was  
8 whether a person had visited a private (=1) or public (= 0) specialist physician in general  
9 practice (GP) during the year.

### 10 Individual characteristics

11 In order to illustrate our approach as clearly as possible, we considered only three individual-  
12 level covariates: age categorized into five age groups, 35–39, 40–45, 50–54, 55–59, and 60–  
13 65 years, using the youngest age group as the reference category in the model specifications;  
14 sex that compared men (=1) with women (=0); and income categorized as ‘low’ when having  
15 less than the median income in Malmö, or ‘high’ otherwise. In the analysis of psychotropic  
16 medication the reference category was high income while in the analysis of private GP choice  
17 the reference category was low income. These choices are cosmetic, but ensure that we  
18 estimate positive rather than negative associations between the outcome and income which  
19 are easier for readers to interpret (psychotropic medication use is higher among the poor while  
20 private GP use is higher among the rich). The median income in Malmö was derived from  
21 individualized household disposable income in 2004 for all individuals aged 35 to 85 in the  
22 city.

1 Neighbourhood variables

2 We defined *neighbourhoods* using small-area market statistics (SAMS) boundaries created by  
3 Statistics Sweden (36). The SAMS boundaries are based on municipalities' sub-division  
4 boundaries which are constructed to maximise the internal homogeneity of housing tenure.

5 The resulting neighbourhoods have an average population of around 1000 individuals.

6 For simplicity, we categorized neighbourhoods as 'rich' or 'poor' according to whether the  
7 proportion of low income individuals in each neighbourhood was below the median across all  
8 neighbourhoods in the city. Paralleling the way we entered individual income into our models,  
9 in the analysis of psychotropic medication we set the reference category for neighbourhood  
10 income to be rich neighbourhoods while in the analysis of private GP we set the reference  
11 category to be poor neighbourhoods.

### 12 *Multilevel analysis of heterogeneity*

13 The data have a two-level hierarchical structure with individuals (level 1) nested within  
14 neighbourhoods (level 2). For the analysis we applied a three step-approach consisting of  
15 fitting, interpreting and contrasting the results of three consecutive multilevel logistic  
16 regression models: the individual effects model (Step 1); the general contextual effects model  
17 (Step 2); and the specific contextual effects model (Step 3).

18 Let  $y_{ij}$  denote the binary response of interest (e.g., use of psychotropic medication or private  
19 GP) for individual  $i$  ( $i = 1, \dots, n_j$ ) in neighbourhood  $j$  ( $j = 1, \dots, J$ ).

20 Step 1 - The individual effects model: Step 1 simply consists of fitting a conventional  
21 single-level logistic regression for  $y_{ij}$  including only the individual-level covariates;  
22 neighbourhoods are completely ignored. In terms of our two illustrative applications, the  
23 covariates are age, sex and income. The model is therefore written as

$$24 \quad y_{ij} \sim \text{Binomial}(1, \pi_{ij}), \quad (1)$$

$$\text{logit}(\pi_{ij}) = \beta_0 + \beta_1 \text{age}_{ij} + \beta_2 \text{sex}_{ij} + \beta_3 \text{income}_{ij},$$

where  $\pi_{ij}$  denotes the probability that individual  $i$  in neighbourhood  $j$  uses psychotropic medication (or private GP) given their individual characteristics  $\text{age}_{ij}$ ,  $\text{sex}_{ij}$  and  $\text{income}_{ij}$ .

The regression coefficients  $\beta_1, \beta_2, \beta_3$  measure the associations between the log-odds of the health outcome and each covariate all else equal and when exponentiated these are translated to ORs. For ease of illustration we have entered age into the model linearly, but we shall relax this assumption when we fit the model. Post-estimation, predicted probabilities  $\hat{\pi}_{ij}$  are calculated for each individual and are used to calculate the AU-ROC for the model.

The AU-ROC (32, 33) is constructed by plotting the true positive fraction (TPF) (i.e., sensitivity) against the false positive fraction (FPF) (i.e.,  $1 - \text{specificity}$ ) for different binary classification thresholds of the predicted probabilities. The AU-ROC measures the ability of the model to correctly classify individuals with or without the outcome (e.g., using or not psychotropic medication or visiting a private vs. a public GP) as a function of individuals' predicted probabilities. The AU-ROC takes a value between 1 and 0.5 where 1 is perfect discrimination and 0.5 would be as equally as informative as flipping a coin (19) (i.e., the covariates have no predictive power). The AU-ROC of the Step 1 model quantifies the accuracy of using individual-level information alone for identifying individuals with the outcome.

**Step 2 – The general contextual effects model:** Step 2 consists of extending the Step 1 model from a conventional single-level logistic regression model to a two-level individuals-within-neighbourhoods logistic regression model. This extended model is written as

$$y_{ij} \sim \text{Binomial}(1, \pi_{ij}), \tag{2}$$

$$\text{logit}(\pi_{ij}) = \beta_0 + \beta_1 \text{age}_{ij} + \beta_2 \text{sex}_{ij} + \beta_3 \text{income}_{ij} + u_j,$$



1 
$$u_j \sim N(0, \sigma_u^2),$$

2 where  $u_j$  denotes the random effect for neighbourhood  $j$ . These effects are assumed normally  
3 distributed with zero mean and variance  $\sigma_u^2$ , a parameter to be estimated.

4 Postestimation, values can be assigned to these effects via empirical Bayes prediction. These  
5 predictions  $\hat{u}_j$  are sometimes referred to as shrinkage estimates as their values are shrunk  
6 towards the population-average of zero by a shrinkage factor proportional to the amount of  
7 information available on each neighbourhood (essentially the neighbourhood size). Shrinkage  
8 is desirable as it protects one against over interpreting otherwise extreme predictions typically  
9 associated with very small neighbourhoods. The statistical uncertainty surrounding these  
10 predictions can also be calculated and communicated via error bars (e.g., 95% confidence  
11 intervals). This uncertainty must be taken into account when ranking neighbourhoods, for  
12 example by predicted prevalence of the health outcome, as such rankings have been shown to  
13 be especially unreliable (see elsewhere for an extended explanation and empirical examples)  
14 (37-39). More generally, the interpretation of neighbourhood rankings needs be done in  
15 relation to the *general contextual effect* (see elsewhere for empirical examples)(2).

16 The *general contextual effect* is appraised using the estimated between-neighbourhood  
17 variance  $\hat{\sigma}_u^2$  as this quantifies the variability in unobserved influences on the health outcome  
18 common to individuals living in in the same neighbourhood. Thus,  $\hat{\sigma}_u^2$  is assumed to reflect  
19 variation in any direct effects of neighbourhood context captured by the neighbourhood  
20 boundaries (i.e., “causal” effect of place). However, in an observational study, it might also  
21 reflect neighbourhood compositional differences in unmodelled individual characteristics  
22 (e.g., unobserved selection of individuals into neighbourhoods). We calculated three different  
23 measures of *general contextual effects*: (i) the change in the AU-ROC compared with the Step  
24 1 model; (ii) the ICC; and (iii) the MOR.

1 (i) While the AU-ROC of the Step 1 model quantifies the accuracy of using individual-level  
2 information alone for identifying individuals with, or without the outcome, the predicted  
3 probabilities from the Step 2 model are based on both the individual-level covariates and the  
4 predicted neighbourhood random effect  $\hat{u}_j$ . Consequently, the AU-ROC of the Step 2 model  
5 can be compared with that from Step 1 to quantify the added value of having information on  
6 the neighbourhood of one's residence when it comes to identifying the outcome of the  
7 individuals. Therefore, in this approach the general contextual effect of the neighbourhood is  
8 appraised by quantifying the increase in the AU-ROC achieved when adding general  
9 neighbourhood information to the individual level predictions calculated in the Step 1 model.  
10 The larger this difference, the greater the general neighbourhood effect is.

11 (ii) We chose to calculate the ICC based on the latent response formulation of the model as it  
12 is the approach most widely adopted in applied work. This formulation assumes a latent  
13 continuous response underlies the observed binary response and it is this latent response for  
14 which the ICC is calculated and interpreted. The higher the ICC, the more relevant  
15 neighbourhood context is for understanding individual latent response variation (10, 12, 25).

16 The ICC is calculated as

17 
$$\rho = \frac{\sigma_u^2}{\sigma_u^2 + \frac{\pi^2}{3}}$$

18 where  $\frac{\pi^2}{3}$  denotes the variance of a standard logistic distribution. (Note that here  $\pi$  denotes the  
19 mathematical constant 3.1416..., not the probability.)

20 (iii) The MOR (10, 28, 29) is an alternative way of interpreting the magnitude of the  
21 neighbourhood variance. The MOR translates the neighbourhood variance estimated on the  
22 log-odds scale, to the widely used OR scale. This makes the MOR comparable with the OR of  
23 individual and neighbourhood covariates. The MOR is defined as the median value of the

1 distribution of ORs obtained when randomly picking two individuals with the same covariate  
 2 values from two different neighbourhoods, and comparing the one from the higher risk  
 3 neighbourhood to the one from the lower risk neighbourhood. In simple terms, the MOR can  
 4 be interpreted as the median increased odds of reporting the outcome if an individual moves  
 5 to another neighbourhood with higher risk. Therefore, the higher the MOR the greater the  
 6 general contextual effect. The MOR is calculated as

$$7 \quad \text{MOR} = \exp\left(\sqrt{2\sigma_u^2}\Phi^{-1}(0.75)\right),$$

8 where  $\Phi^{-1}(\cdot)$  represents the inverse cumulative standard normal distribution function. In  
 9 absence of neighbourhood variation (i.e.,  $\sigma_u^2 = 0$ ), the MOR is equal to 1.

10 **Step 3 – The specific contextual effects model:** Step 3 consists of adding the neighbourhood  
 11 covariate of interest to the model in order to estimate the specific OR for a contextual  
 12 variable. In our case we are interested in the effect of neighbourhood income (i.e., rich or  
 13 poor) on each outcome. The step 3 model can be written as

$$14 \quad y_{ij} \sim \text{Binomial}(1, \pi_{ij}), \quad (3)$$

$$15 \quad \text{logit}(\pi_{ij}) = \beta_0 + \beta_1 \text{age}_{ij} + \beta_2 \text{sex}_{ij} + \beta_3 \text{income}_{ij} + \beta_4 \text{nincome}_j + u_j,$$

$$16 \quad u_j \sim N(0, \sigma_u^2),$$

17 where `nincome` denotes the additional neighbourhood covariate.

18 Specific contextual effects measure the associations between contextual characteristics of the  
 19 neighbourhood (e.g., rich or poor neighbourhood) and the individual outcome. As in the case  
 20 of individual-level observational effects, specific contextual effects are estimated using  
 21 measures of average effect such as ORs. However, an extended misunderstanding when  
 22 applying multilevel regression analyses is to give a “population average” interpretation to the  
 23 OR of contextual variables (10, 28, 29).

1 The point is that the multilevel regression provides regression coefficients for individual  
2 variables that are adjusted for the neighbourhood-level random effects. That is, they reflect  
3 the association between individual level variables and the outcome within a specific  
4 neighbourhood. They are therefore termed “neighbourhood specific” or “cluster specific”  
5 ORs. However, in multilevel logistic regression, a contextual OR can hardly be interpreted in  
6 this way since the contextual variable is constant for all individuals in the neighbourhood. The  
7 contextual OR can at best be interpreted as contrasting two neighbourhoods differing in the  
8 value of the contextual variable by one-unit, but which have identical value for the  
9 neighbourhood-level random effects (and all other covariates). To avoid this difficult  
10 interpretation, Larsen *et al* (28, 29) proposed the use of the IOR-80% as a way of including  
11 the neighborhood variance in the quantification of a contextual OR.

12 The lower and upper bounds of the IOR-80% for `income` are calculated as

13 
$$\exp\left(\beta_4 \pm \sqrt{2\sigma_u^2} \Phi^{-1}(0.9)\right).$$

14 The IOR-80% is defined as the middle 80% range of the distribution of ORs formed by  
15 making random pairwise comparison between neighbourhoods exposed and non-exposed to  
16 the contextual variable. The IOR-80% interval is narrow if the between-neighbourhood  
17 variance  $\sigma_u^2$  is small, and it is wide if the between-neighbourhood variance is large. If the  
18 IOR-80% interval contains 1, then for some neighbourhoods the association is in the opposite  
19 direction to the overall OR (28) (10).

20 An alternative to the IOR-80% is the Proportion of Opposed Odds Ratios (POOR). That is,  
21 the proportion of ORs with the opposite direction to the overall OR (10). The values of the  
22 POOR extend between 0% and 50%. A POOR of 0% means all ORs have the same sign. A  
23 POOR of 50% means that half of the ORs are of the opposite sign and so the association is

1 very heterogeneous. For our binary measure of neighbourhood income, the POOR is  
2 calculated as

$$3 \quad \text{POOR} = \Phi\left(-\frac{\beta_4}{\sqrt{2\sigma_u^2}}\right).$$

4 Observe that in Step 2 we calculated the AU-ROC as a way of quantifying neighbourhood  
5 general contextual effects. In Step 3, we included a specific contextual characteristic of the  
6 neighbourhood (i.e., low neighbourhood income) into the model in order to quantify specific  
7 contextual effects. However, adding this specific contextual variable cannot increase the AU-  
8 ROC obtained in the Step 2 model since that model gives the maximum AU-ROC that can be  
9 obtained by combining the available individual information and the neighbourhood identity.  
10 The latter captures the totality of potentially observable, but also unobservable neighbourhood  
11 factors. The inclusion of a specific neighbourhood contextual variable as a fixed-effect  
12 covariate will explain some of that neighbourhood variance (that is, decrease the average  
13 absolute size of the neighbourhood  $u_j$  estimates) and, thereby reducing the predictive role of  
14 the neighbourhood random effects. However, this change to the model specification  
15 simultaneously improves the model prediction through the addition of the regression  
16 coefficient for the neighbourhood income variable. Because of this balance the discriminatory  
17 accuracy of the Step 2 and 3 models will be effectively the same.

18 Step 3 provides a way of understanding the mechanism behind the observed general  
19 contextual effects. For this purpose we can calculate the proportional change in variance  
20 (PCV) defined as the proportion of the neighbourhood variance in Model 2 explained by  
21 adding the specific neighbourhood effect (i.e., neighbourhood income variable) in Model 3

$$22 \quad \text{PCV} = \frac{\sigma_{u[\text{Model 2}]}^2 - \sigma_{u[\text{Model 3}]}^2}{\sigma_{u[\text{Model 2}]}^2}.$$

1 In our case, a large PCV would suggest that the general contextual effect is substantially  
2 mediated by the neighbourhood income variable.

### 3 *Summary of the multilevel analysis of heterogeneity approach*

4 In multilevel analysis of heterogeneity, we need a joined analysis that includes individual  
5 variables, neighbourhood boundaries, and neighbourhood characteristics. We need to include  
6 measures of association, variance and discriminatory accuracy. The simplistic “risk factor”  
7 approach based on the calculation of ORs alone is insufficient

8 In our two example studies we perform a series of three consecutive regression models.

9 We start with Model 1 (Step 1) that only includes individual-level covariates in a standard  
10 (i.e., single-level) logistic regression. The selection of these individual variables is based on  
11 the assumption that they condition the outcome and also the neighbourhood of residence. For  
12 instance, age is associated with use of psychotropic medicine and individuals may move to  
13 certain neighbourhoods when they become older. That is, we aim to prevent compositional  
14 confounding in later regression analyses. The candidate individual-level variables are not  
15 mediators of the neighbourhood effects. In our example the neighbourhood cannot change the  
16 age of the individuals. Besides the average ORs for the individual-level variables, the  
17 fundamental information in Model 1 is the size of the AU-ROC.

18 In Model 2 (Step 2) we quantify the added value of having neighbourhood level information.

19 We only include the neighbourhood boundaries without specifying any neighbourhood  
20 characteristic. We analyse the change in the AU-ROC compared with Model 1. We also  
21 interpret the ICC and the MOR. This information tells us about the size of the general  
22 contextual effect.

23 In the final model, Model 3 (Step 3), we include specific neighbourhood information  
24 (neighbourhood income). In this model, the interpretation of the OR, the IOR and POOR must

1 always be done in relation to the neighbourhood variance  $\sigma_u^2$  of Model 2 and the PCV  
2 associated with moving from Model 2 to Model 3. For instance, suppose Model 2 estimated a  
3 high value for  $\sigma_u^2$  and therefore a high ICC for the binary outcome “visiting a private vs. a  
4 public GP”. Thereafter, in Model 3, we include a contextual variable (neighbourhood high  
5 income). If neighbourhood high income is associated with the outcome (a high OR) and it  
6 explains a large share of  $\sigma_u^2$  (PCV is high) the IOR-80% will be narrow and the POOR low.  
7 This case illustrates a situation where the neighbourhood context conditions the outcome (i.e.,  
8 high  $\sigma_u^2$  and ICC). It also demonstrates that this influence appears mediated by the contextual  
9 variable (neighbourhood high income) so the contextual variable is not only strongly  
10 associated with the outcome but it also explains the neighbourhood variance and thereby  
11 shows a narrow IOR-80% or a low POOR. In other words, the conclusion would be that the  
12 neighbourhood context influences the individual choice of GP and that this influence has to  
13 do with the socioeconomic circumstances of the neighbourhoods

14 However, there are other possible situations. For instance,  $\sigma_u^2$  could be very low from the  
15 beginning (Model 2) and the contextual variable could be significantly associated with the  
16 outcome but still does not explain much of the  $\sigma_u^2$  (i.e., low PCV) in Model 3. Nevertheless,  
17 since  $\sigma_u^2$  was low from the beginning, the IOR-80% would also be narrow and the POOR low.  
18 In this case the neighbourhood context would have a small influence on the individual choice  
19 of GP even if the socioeconomic circumstances of the neighbourhoods are, on average,  
20 associated with the outcome and the IOR-80% is narrow.

### 21 *Model estimation*

22 The models were estimated using Markov chain Monte Carlo (MCMC) methods as  
23 implemented in the MLwiN multilevel modelling software (40). We specify diffuse (vague,  
24 flat, or minimally informative) prior distributions for all parameters. We use quasilielihood  
25 estimation to provide good starting values for all parameters. For each model, we specified a

1 burn-in length of 5,000 iterations and a monitoring chain length of 10,000 iterations. Visual  
2 assessments of the parameter chains and standard MCMC convergence diagnostics suggest  
3 that the lengths of these periods are sufficient. The Bayesian deviance information criterion  
4 (DIC) was used as a measure of goodness of fit of our models (41). The DIC considers both  
5 the model deviance and its complexity. Models with smaller DIC are preferred to models with  
6 larger DIC, with differences of five or more considered substantial (42).

### 7 *Online supplementary materials*

8 A fully anonymized version of the data is provided in the Online Supplementary Materials.  
9 We also provide the saved MLwiN worksheet for each model and an Excel sheet for the  
10 calculation of the ICC, MOR, 80%IOR and the POOR. A Stata do-file and dataset is also  
11 made available for users of that software.

## 12 **Ethics statement**

13 The National Board of Health and Welfare and Statistics Sweden constructed the database by  
14 means of record linkage of different registers using the unique Swedish personal identification  
15 number. Finally, the Swedish authorities delivered the research database to us without the  
16 personal identification numbers to ensure the anonymity of the subjects. The Regional Ethics  
17 Review Board in southern Sweden as well as the data safety committees from the National  
18 Board of Health and Welfare and from Statistics Sweden approved the construction of the  
19 LOMAS database.

20 For the purpose of our study we created a fully anonymized sample that completely prevents  
21 the identification of individuals using a combination of variables. This fully anonymized  
22 sample is provided in the Online Supplementary Materials.

23



1 **Results**

2 *Characteristics of the population (Table 1)*

3 In the study sample, use of psychotropic drugs was more frequent in individuals with low  
4 income and in poor neighbourhoods while the opposite was true for visiting a private GP.

5 Rich neighbourhoods had a higher percentage of people 55 years or older and a slightly lower  
6 percentage of men than poor neighbourhoods.

7

1

Table 1. Characteristics of the population 35 – 65 year-olds in Malmö, 2006 by neighbourhood income

|                       | Neighbourhood income |               |
|-----------------------|----------------------|---------------|
|                       | Poor (N= 93)         | Rich (N= 125) |
| Number of individuals | 22780                | 20511         |
| Psychotropic drugs    | 29%                  | 23%           |
| Private GP            | 11%                  | 35%           |
| Low income            | 60%                  | 27%           |
| Men                   | 45%                  | 42%           |
| Age (year-groups)     |                      |               |
| 35 – 39               | 19%                  | 17%           |
| 40 – 44               | 18%                  | 17%           |
| 45 – 49               | 17%                  | 15%           |
| 50 – 54               | 16%                  | 16%           |
| 55 – 59               | 16%                  | 18%           |
| 60 – 64               | 14%                  | 17%           |

2

### 3 *Analysis of the use of psychotropic drugs (Table 2)*

#### 4 Specific Individual Average Observational Effects

5 The individual level population average Model 1 shows that use of psychotropic drugs  
6 increases monotonically with age and was more frequent for women and among people with  
7 low income. These individual characteristics, however, were not sufficient for predicting  
8 individuals' use of psychotropic drugs with any degree of accuracy since the AU-ROC was  
9 low (i.e., 0.616.) (Figure 1). In Model 2, the cluster specific association between individual  
10 income and use of psychotropic drugs was lower than the population average association in  
11 Model 1.

12

Table 2. Multilevel logistic regression analysis of psychotropic drug use in the 35 – 65 year-old population of Malmö, 2006. Values are odds ratios (OR) with 95% confidence interval (CI) unless stated otherwise. The intercept is not shown in the table.

|                                            | Simple logistic       | Multilevel logistic   |                       |
|--------------------------------------------|-----------------------|-----------------------|-----------------------|
|                                            | regression analysis   | regression analysis   |                       |
|                                            | Model 1               | Model 2               | Model 3               |
| <b>Specific Individual Average Effects</b> |                       |                       |                       |
| Men vs. women                              | 0.61 (0.58 – 0.64)    | 0.60 (0.58 – 0.63)    | 0.60 (0.58 – 0.63)    |
| <b>Age groups</b>                          |                       |                       |                       |
| 35 – 39                                    | Reference             |                       |                       |
| 40 – 44                                    | 1.35 (1.24 – 1.46)    | 1.35 (1.25 – 1.45)    | 1.35 (1.24 – 1.46)    |
| 45 – 49                                    | 1.63 (1.50 – 1.77)    | 1.64 (1.51 – 1.77)    | 1.63 (1.51 – 1.77)    |
| 50 – 54                                    | 1.81 (1.67 – 1.95)    | 1.82 (1.69 – 1.96)    | 1.82 (1.68 – 1.97)    |
| 55 – 59                                    | 1.91 (1.76 – 2.07)    | 1.94 (1.80 – 2.10)    | 1.95 (1.81 – 2.10)    |
| 60 – 64                                    | 1.95 (1.80 – 2.11)    | 2.00 (1.85 – 2.16)    | 2.01 (1.86 – 2.17)    |
| Low vs. high income                        | 1.67 (1.60 – 1.74)    | 1.56 (1.49 – 1.64)    | 1.52 (1.44 – 1.59)    |
| <b>Specific Contextual Average Effects</b> |                       |                       |                       |
| Low vs. high neigh income                  |                       |                       | 1.29 (1.21 – 1.38)    |
| 80% IOR                                    |                       |                       | 0.99 – 1.69           |
| POOR (%)                                   |                       |                       | 11                    |
| <b>General contextual effects</b>          |                       |                       |                       |
| Neighbourhood variance                     |                       | 0.038 (0.026 – 0.054) | 0.022 (0.012 – 0.035) |
| PCV (%)                                    |                       |                       | 42                    |
| ICC (%)                                    |                       | 1.1 (0.8 – 1.6)       | 0.7 (0.4 – 1.1)       |
| MOR                                        |                       | 1.20 (1.17 – 1.25)    | 1.16 (1.11 – 1.20)    |
| AU-ROC                                     | 0.616 (0.610 – 0.622) | 0.630 (0.625 – 0.636) | 0.629 (0.623 – 0.635) |
| AU-ROC change*                             |                       | 0.014                 | -0.001?               |
| <b>Goodness of fit</b>                     |                       |                       |                       |
| DIC                                        | 48205                 | 48063                 | 48041                 |
| DIC change*                                |                       | -142                  | -22                   |

IOR: interval odds ratio. POOR: proportion of opposed odds ratios. PCV: proportional change in the variance. ICC: intra-class correlation coefficient. MOR: median odds ratio. AU-ROC: area under the receiver operating characteristic curve. DIC: Bayesian deviance information criterion. \*: Change in relation to the previous model.

- 1
- 2 Specific Contextual Average Observational Effects: IOR and POOR
- 3 In Model 3 we observed that, over and above individual income, age and sex, living in a low
- 4 income neighbourhood conclusively increased the individual probability of use of
- 5 psychotropic drugs (i.e., OR= 1.29). However, the 80%-IOR included 1 and the percentage of
- 6 ORs of opposite direction was considerable (POOR=11%).

1 General Contextual Observational Effects: neighbourhood variance, ICC, MOR and AU-ROC

2 In Model 2, The ICC and the MOR were low (i.e., 1.1% and 1.20 respectively) which

3 indicated that the neighbourhoods, as defined by the SAMS geographical boundaries, do not

4 appear to capture a relevant context for understanding an individual's propensity of using

5 psychotropic drugs.

6 The added value of knowing an individual's neighbourhood of residence besides individual

7 information (age, sex and income) was very small since the AU-ROC only increased 0.014

8 units when comparing Model 2 with Model 1 (Fig. 1).

9 In Model 3, inclusion of the neighbourhood income variable explained 42% of the

10 neighbourhood variance and decreased the ICC and MOR values to 0.7% and 1.16

11 respectively.

12

Figure 1: Areas under the receiver operating characteristic (AU-ROC) curve for use of psychotropic drugs during 2006 in the city of Malmö, Sweden plotted separately for Model 1 which only adjusts for individual-level covariates age, sex and income (black thick line), and Model 2 which additionally adjust for neighbourhood of residence (grey dotted line)

13

14 Figure 2 shows the ranking of the neighbourhoods of Malmö in 2006 according to their

15 logarithmic (log) odds ratio (OR) of using psychotropic drugs, having the average of the

16 whole city sample as reference. Fig. 2A represents the values obtained from a model

17 including age, sex and individual income (Model 2); and Fig. 2B represents a model which

18 additionally adjusts for neighbourhood income (Model 3).

19

Figure 2: Ranking of the neighbourhoods of Malmö in 2006 according their use of psychotropic drugs. The values are obtained from multilevel logistic regression analyses and represent logarithmic (log) odds ratio (OR), having the average of the whole city sample as reference. (A) Represents the values obtained from Model 1 which includes age,

sex and individual income; and (B) Model 2 which additionally adjusts for neighbourhood income. The value of the intra-class correlation coefficient (ICC) is included as a percentage.

1 Figure 2 indicates that there was considerable uncertainty in the ranking of the  
2 neighbourhoods, which expressed itself as a substantial overlapping of the confidence  
3 intervals. These “league tables” are only based on neighbourhood differences and need to be  
4 interpreted side-by-side with measures of general neighbourhood effects. Indeed, the ICC was  
5 very low in both models.

#### 6 *Analysis of choosing a private vs. a public specialist physician in general practice (Table 3)*

##### 7 Specific Individual Average Observational Effects

8 The population average Model 1 indicates that the odds of choosing a private GP were similar  
9 for men and women, and that they were somewhat higher among individuals aged 50 to 64  
10 than among younger individuals. High individual income clearly increased the odds of  
11 choosing a private GP. These individual characteristics, however, were not sufficient for  
12 predicting individuals’ choice of GP with any degree of accuracy since the Model 1 AU-ROC  
13 was low (i.e., 0.600)

14 Interestingly, the association between individual income and choosing a private GP declined  
15 when we recognized the multilevel structure of the data and included the neighbourhood level  
16 as a random effect in Model 2. This situation expresses the fact that the individual association  
17 in Model 1 was capturing not only a modest within neighbourhood association but also a  
18 stronger between neighbourhood association, A situation that was confirmed in Model 3 (see  
19 under “Specific contextual average effects”) since the neighbourhood income was, on  
20 average, strongly associated to choosing a private GP.

##### 21 Specific contextual effects: IOR and POOR

1 Model 3 shows that high neighbourhood income was, on average, strongly associated with  
2 visiting a private physician (OR= 3.50). So the customary interpretation would be that, over  
3 and above individual income, age and sex, living in a high income neighbourhood strongly  
4 increased the individual probability of visiting a private physician. However, this contextual  
5 variable only explained a small share (PCV= 11%) of the initially large neighbourhood  
6 variance. Therefore, unmodeled variability between neighbourhoods remained large as  
7 expressed by the wide IOR-80% = 130.28 - 0.09. Also the POOR indicated that 33% of the  
8 time an individual from a high income neighbourhood had a lower, rather than higher,  
9 likelihood of visiting a private GP than an individual from a low income neighbourhood. That  
10 is, the average OR hides strong heterogeneity around the average association.

11 General Contextual Effects: Neighbourhood variance, ICC, MOR and AU-ROC

12 If the neighbourhood context were relevant for understanding individuals' choice of private vs  
13 public GPs we would expect a high ICC, a high MOR and a high increase of the AU-ROC in  
14 Model 2 compared to Model 1. This is just what we found. The ICC in Model 2 was close to  
15 60% and the MOR close to 8 which are very high values in "neighbourhood and health"  
16 studies. Furthermore, adding information on neighbourhood in Model 2 increased the AU-  
17 ROC of Model 1 from about 0.6 to almost 0.9 which indicates that knowing the  
18 neighbourhood of one's residence allows us to predict with rather high accuracy if an  
19 individual will choose a private versus a public GP (see Figure 3).

20 If the large observed general neighbourhood effect were mediated by neighbourhood income  
21 (or by other unobserved neighbourhood characteristics that this covariate may proxy for) we  
22 would expect a considerable reduction of the neighbourhood variance, the ICC, and the MOR  
23 in Model 3 compared with Model 2. However, this was not the case. In support of this  
24 argument, measuring the AU-ROC using only individual variables and neighbourhood income  
25 but not the neighbourhood random effect gave an AU-ROC (95% confidence interval) =

- 1 0.620 (0.614 – 0.626) which is only 0.03 units higher than Model 1 with only individual level  
 2 variables.

Table 3. Multilevel logistic regression analysis of choosing a private versus a public specialist in the 35 – 65 year-old population of Malmö, 2006, Values are odds ratios (OR) and 95% confidence interval (CI) unless stated otherwise.

|                                            | Simple logistic regression analysis |                       | Multilevel logistic regression analysis |  |
|--------------------------------------------|-------------------------------------|-----------------------|-----------------------------------------|--|
|                                            | Model 1                             | Model 2               | Model 3                                 |  |
| <b>Specific individual average effects</b> |                                     |                       |                                         |  |
| Men vs. women                              | 0.96 (0.92 – 1.01)                  | 0.94 (0.88 – 1.01)    | 0.94 (0.88 – 1.01)                      |  |
| <b>Age groups</b>                          |                                     |                       |                                         |  |
| 35 – 39                                    | Reference                           |                       |                                         |  |
| 40 – 44                                    | 1.01 (0.93 – 1.09)                  | 1.07 (0.94 – 1.20)    | 1.07 (0.94 – 1.20)                      |  |
| 45 – 49                                    | 1.02 (0.94 – 1.11)                  | 1.22 (1.07 – 1.37)    | 1.22 (1.07 – 1.37)                      |  |
| 50 – 54                                    | 1.08 (1.00 – 1.17)                  | 1.25 (1.10 – 1.41)    | 1.25 (1.10 – 1.41)                      |  |
| 55 – 59                                    | 1.21 (1.12 – 1.31)                  | 1.30 (1.16 – 1.46)    | 1.30 (1.16 – 1.46)                      |  |
| 60 – 64                                    | 1.20 (1.10 – 1.30)                  | 1.20 (1.06 – 1.35)    | 1.20 (1.06 – 1.35)                      |  |
| High vs. low income                        | 2.13 (2.02 – 2.24)                  | 1.14 (1.06 – 1.22)    | 1.14 (1.06 – 1.22)                      |  |
| <b>Specific contextual average effects</b> |                                     |                       |                                         |  |
| High vs. low neighbourhood income          |                                     |                       | 3.50 (2.13 – 5.78)                      |  |
| 80% IOR                                    |                                     |                       | 0.09 – 130.28                           |  |
| POOR (%)                                   |                                     |                       | 33                                      |  |
| <b>General contextual effects*</b>         |                                     |                       |                                         |  |
| Neighbourhood variance                     |                                     | 4.479 (3.699 – 5.502) | 3.980 (3.277 – 4.892)                   |  |
| PCV (%)                                    |                                     |                       | 11                                      |  |
| ICC (%)                                    |                                     | 57.8 (53.1 – 62.7)    | 54.9 (50.1 – 59.9)                      |  |
| MOR                                        |                                     | 7.53 (6.42 – 9.37)    | 6.71 (5.62 – 8.25)                      |  |
| AU-ROC                                     | 0.600 (0.593 – 0.606)               | 0.895 (0.891 – 0.899) | 0.895 (0.891 – 0.899)                   |  |
| AU-ROC change*                             |                                     | 0.295                 | 0.000                                   |  |
| <b>Goodness of fit</b>                     |                                     |                       |                                         |  |
| DIC                                        | 44726                               | 24647                 | 24648                                   |  |
| DIC change*                                |                                     | -20079                | 1.28                                    |  |

IOR: interval odds ratio. POOR: proportion of opposed odds ratios. PCV: proportional change in the variance. ICC: intra-class correlation coefficient. MOR: median odds ratio. AU-ROC: area under the receiver operating characteristic curve. DIC: Bayesian diagnostic information criterion. \*: change in relation to the previous model

3

4

Figure 3. Areas under the receiver operating characteristic curve (AU-ROC) for choosing a private vs. a public GP during 2006 in the city of Malmö, Sweden plotted separately for Model 1 which only adjusts for individual-level covariates age, gender and income (black thick line); and for Model 2 which additionally adjusts for the neighbourhood of residence (grey dotted line)

1

2 Fig, 4 shows the ranking of the neighbourhoods of Malmö in 2006 according to their log OR  
3 of visiting a private GP, having the average of the whole city sample as reference. Fig. 4A  
4 represents the values obtained from a model including age, sex and individual income (Model  
5 2); and Fig. 4B represents a model which additionally adjusts for neighbourhood income  
6 (Model 3).

Figure 4: Ranking of the neighbourhoods of Malmö in 2006 according their use of a private GP. The values are obtained from multilevel logistic regression analyses and represent logarithmic (log) odds ratio (OR), having the average of the whole city sample as reference. (A) represents the log ORs obtained from Model 1 which includes age, sex and individual income; and (B) Model 2 which additionally adjusts for neighbourhood income. The value of the intra-class correlation (ICC) coefficient is included as a percentage

7 We observed a bimodal distribution for the neighbourhood differences with two groups of  
8 neighbourhoods, one smaller group with a higher probability of visiting a private GP, and  
9 another larger group with a lower probability. This bimodality reflects the underlying nature  
10 of private GP use. In our case, it revealed that over and above age, sex and individual income,  
11 individuals in some neighbourhoods mostly visit private physicians while individuals in other  
12 neighbourhoods mostly visit public GPs. A similar bimodality is frequently observed when  
13 there are strong general contextual effects as is the case when analysing individual within  
14 households (2, 43), sibling within families (44), or children within mothers (45).

15 This bimodality was not a concern for the statistical analysis as the number of  
16 neighbourhoods was high, which makes the assumption of normally distributed random



1 effects less relevant (46). Nevertheless, adjusting for neighbourhood income (low vs high)  
2 reduced the bimodality and it is assumable that the bimodality might be further reduced by  
3 modelling neighbourhood income in a more flexibly way (e.g., by entering a continuous  
4 measure of income as a polynomial). The pattern of neighbourhood differences also suggests  
5 the existence of spatial correlation which could be conditioned by the segregation of private  
6 practices in specific geographical areas. It is possible to allow for spatially correlated random  
7 effects in multilevel logistic regression, but this is beyond the scope of the current article.

8 We also note that there was high individual socioeconomic segregation. Multilevel logistic  
9 regression analyses have recently been proposed for modelling social and other forms of  
10 segregation (47-49). Applying those ideas to our data, we fit a separate multilevel logistic  
11 regression analyses, modelling low individual income as the response variable. We estimated  
12 a neighbourhood variance of 1.032 which corresponds to an ICC of 24% and substantial  
13 segregation. Therefore, adjusting neighbourhood income for individual income is based on  
14 strong extrapolations since there are few individuals with high income living in poor  
15 neighbourhoods as well as few individuals with low income living in rich neighbourhoods.

## 16 Discussion

17 We have presented two applications illustrating how to use multilevel logistic regression  
18 analysis of heterogeneity to estimate individual and neighbourhood influences on individual  
19 health and health care utilization. Our three-step approach distinguishes between specific  
20 (measures of association) and general (measures of variance) contextual effects, and  
21 demonstrates the relevance of combining both approaches for gaining greater substantive  
22 understanding of the phenomenon under study. We analyse two different individual outcomes  
23 (psychotropic drug use and visit to a private vs. public GP) for which the relative importance  
24 of neighbourhood influences differs substantially. Our results agree with previous studies on

1 the city of Malmö observing a large general neighbourhood effect for individual choice of  
2 private physician in 1999 (i.e., ICC = 33%, MOR= 3.36) (28) but a minor general  
3 neighbourhood effect for use of anxiolytic-hypnotic drugs (i.e., ICC= 1.7%, MOR = 1.25) in  
4 1991-1996 (50).

5 We question the current probabilistic, risk factor epidemiological approach based on the  
6 simple interpretation of ORs for specific individual and contextual (e.g., neighbourhood)  
7 characteristics in isolation (18). We promote a three-step multilevel analytical approach. Step  
8 1 consists of fitting a single-level logistic regression adjusting for only the individual-level  
9 covariates, then evaluating the ORs and calculating the discriminatory accuracy (e.g., AU-  
10 ROC) of these variables. Step 2 consists of extending the model to two-levels (by adding the  
11 neighbourhood random effect) and then assessing the importance of general contextual effects  
12 using the ICC and AU-ROC. Step 3 consists of adding specific neighbourhood characteristics  
13 (i.e., specific neighbourhood effects) to the model and interpreting their ORs jointly with the  
14 size of the initial general contextual effect and the size of the neighbourhood variance  
15 explained (i.e., PCV). We argue that the incorrect population average interpretation of the OR  
16 for contextual variables needs be avoided. For this purpose the IOR or the POOR should be  
17 presented side-by-side with the average OR.

### 18 *Psychotropic drug use*

19 Applying our three-step approach to psychotropic drug use, we observed that sex, increased  
20 age, and individual low income were associated with the use of this medication. However, the  
21 information provided by these individual characteristics did not allow users of psychotropic  
22 drugs to be distinguished from non-users with any degree of accuracy (AU-ROC= 0.616). We  
23 also observed a very small general contextual effect since accounting for neighbourhood of  
24 residence only increased the AU-ROC by 0.014 units and both the ICC (i.e., 1.1%) and the

1 MOR (i.e., 1.20) were very low. In fact, our results suggest that SAMS neighbourhoods were  
2 more similar to simple random samples from the population of Malmö, than to meaningful  
3 contexts influencing individual psychotropic drug use.

4 The low AU-ROC of the neighbourhood context (i.e., the low general contextual effects)  
5 needs to be considered when interpreting the small but conclusive association between low  
6 neighbourhood income and individual use of psychotropic drugs. One could argue that this  
7 neighbourhood variable explained 42% of the neighbourhood variance, but as such variance  
8 was rather small (i.e.,  $\hat{\sigma}_u^2 = 0.038$ ), it actually explained a lot of very little. Furthermore, the  
9 POOR informed that 11% of the time the positive association between low neighbourhood  
10 income and individual psychotropic drug use was in the opposite direction with a decreased,  
11 rather than increased, propensity of using psychotropic drugs in the low income  
12 neighbourhoods.

13 Paradoxically, when the neighbourhood variance is low (i.e., there is a weak general  
14 contextual effect) it is easier to obtain “significant” associations with narrow 95% CI for the  
15 contextual variables (i.e., specific contextual effect). This situation happens because we assign  
16 the values of neighbourhood variable to uncorrelated individuals in the sample. In other  
17 words, the less neighbourhood boundaries matter for the outcome, the easier it is to get  
18 “significant” associations between specific neighbourhood characteristics and the individual  
19 outcome. When researchers plan a study of “neighbourhood and health”, they typically  
20 assume that there is a strong intra-neighbourhood correlation. However, we need to check this  
21 assumption and always interpreted the specific contextual effect (i.e., OR and 95% confidence  
22 interval) considering the size of the initial general contextual effects (e.g., ICC or AU-ROC).  
23 Following the three-stage approach promoted in this article ensures a more appropriate  
24 interpretation.

1 The low general neighbourhood effects could be related to the fact that psychotropic drug use  
2 may be conditioned by other kind of contexts like the physicians or the Primary Health Care  
3 centres where the individuals are treated. The SAMS areas were relatively easy to obtain but  
4 their definition was not based on robust theory related to the contextual processes and  
5 mechanisms that may condition use of psychotropic drugs (or, for that matter, the choice of a  
6 private GP). In fact, the relevant context may not be at the neighbourhood level at all.  
7 Prescription of psychotropic drugs is homogenously regulated all over Sweden (51), which  
8 may reduce the influence of the neighbourhood on individual use of this medication.  
9 However, larger contextual effects might be observed when studying countries with different  
10 health care systems and therapeutic traditions or where psychotropic drugs are available over  
11 the counter. We have previously observed such a situation in the context of studying blood  
12 pressure. We identified a very low general contextual effect of the city areas in Malmö (6),  
13 but this effect was much higher when analysing countries with different health care systems  
14 (7)

15 In summary, we were not able to identify with accuracy the factors that predict psychotropic  
16 drug use. What we did find was that individual age, sex, and low income appeared to be poor  
17 predictors for identifying users of psychotropic drugs, and additionally including  
18 neighbourhood of residence did not alter this situation. That is, the neighbourhood context had  
19 only a negligible influence on individual use of psychotropic drugs.

#### 20 *Choice of a private vs. a public GP*

21 Concerning individual choice of private vs. public GP, our analysis showed that while the sex  
22 of the individual was not related to this choice, age was weakly positively associated and  
23 individual high income strongly associated (OR = 2.13) to this choice. However, as in the  
24 case of psychotropic drug use, the low discriminatory accuracy (AU-ROC= 0.600) rendered

1 the information supplied by these individual-level covariates insufficient for distinguishing  
2 who would choose a private vs. public GP. However, we found a very strong general  
3 contextual effect since accounting for neighbourhood of residence in the analysis increased by  
4 0.295 units the AU-ROC to 0.895. Also, the large ICC (i.e., 57.8%) and MOR (i.e., 7.53)  
5 values indicate that SAMS neighbourhoods captured a meaningful context influencing this  
6 individual behaviour. The socioeconomic context of the neighbourhoods (i.e., high vs. low  
7 neighbourhood income) was, on average, associated with choosing a private GP (OR = 3.50).  
8 However, this specific neighbourhood variable only explained 11% of the large  
9 neighbourhood variance in Model 2 (i.e.,  $\hat{\sigma}_u^2 = 4.479$ ). In fact, in as much as 33% of  
10 comparisons between rich and poor neighbourhoods, the OR for neighbourhood income was  
11 in the opposite direction so high neighbourhood income was associated to a lower rather than  
12 a higher propensity of choosing a private GP.

13 We observed that, on average, utilization of private GPs was higher among high income  
14 people and in high income neighbourhoods than in the low income categories, which deserves  
15 a closer analysis. In fact, access to health care in Sweden is by law (52) on equal terms and  
16 according to needs, and for many years societal funding has equally financed both public and  
17 private health (53) so economic circumstances should not be the main reason for choosing a  
18 public vs. a private GP (53). The observed link between income and utilization of private GPs  
19 might depend on cultural preferences rather than solely on economic reasons. It is known, for  
20 example, that choice of sector also carries a symbolic meaning (54) and high income  
21 individuals have been argued to intrinsically prefer private care. However, an alternative  
22 explanation could be the existence of “invisible” barriers like adverse attitudes of private GPs  
23 against low income individuals, which might channel those individuals towards public GPs  
24 (53).

1 In summary, over and above individual characteristics the neighbourhood of residence  
2 strongly predicted the choice of a private vs. a public GP, but the reasons for this phenomenon  
3 are only partially explained by socioeconomic circumstances of the neighbourhoods. On  
4 average, individuals residing in high income neighbourhoods had a higher propensity of  
5 visiting a private GP, but this contextual variable only explained a low proportion of the  
6 variation in neighbourhood differences. Other contextual factors not considered in our  
7 analysis, for instance, the degree of private GP provision in each neighbourhood might go  
8 some way to explaining the observed general contextual effects.

### 9 *Public Health implications*

10 Our results are relevant when planning public health interventions. For example, policies to  
11 improve psychological health or reduce the use of psychotropic drugs in the city of Malmö,  
12 would need to realize that focusing on specific neighbourhoods would not be effective  
13 because of the low discriminatory accuracy of this information. In fact, the same is true for  
14 the individual characteristics we analysed: age, sex, and income. Put differently, neither  
15 neighbourhood of residence nor the individual characteristics studied provided accurate  
16 information for identifying target groups. If policy makers do choose to focus on those  
17 individuals and neighbourhood with a higher average risk of using psychotropic drugs (which  
18 would be the normal procedure in risk factors epidemiology), they need to be aware that many  
19 psychotropic users would be labelled as “low risk” and that many non-users of psychotropic  
20 drugs would be labelled as “high-risk”. That is, focusing on only high risk groups would  
21 unnecessarily expose many individuals to an intervention they do not need and would leave  
22 many individuals untreated because they belong to low risk groups. Perhaps a better approach  
23 would be to launch an intervention on the whole population. In any case, considering the  
24 balance between harms and benefits, an intervention with low discriminatory accuracy  
25 conveys that the principle of *primum non nocere* must be an absolute condition.

1 The public health implications of our second analysis are very different. Here, policies to  
2 increase the use of public GP services should mostly focus on specific neighbourhoods,  
3 perhaps by opening local public GP alternatives.

#### 4 *Multilevel analysis of heterogeneity and risk factors epidemiology*

5 The multilevel analysis of heterogeneity we present in our study is rather innovative (18).  
6 Most studies analysing the role of individual or contextual variables on health adopt a  
7 probabilistic perspective based on the analysis of differences in average risk between exposed  
8 and unexposed groups (55) but without recognizing the value of analysing variance (56) . This  
9 is the classical approach in so called “risk factors epidemiology” and many multilevel  
10 analyses have only focused on the identification of contextual risk factors such as  
11 neighbourhood social capital and neighbourhood deprivation. From this perspective small or  
12 even tiny effects (e.g., OR = 1.5 or even lower) with very low discriminatory accuracy are  
13 considered relevant. The problem is that by doing so we promote population level policies and  
14 interventions that may lead to both under and overtreatment, as well as unnecessary side  
15 effects and costs. It also raises ethical concerns related to misleading risk communication and  
16 the perils of both unwarranted interventions and stigmatization of exposed individuals (57).

17 The multilevel analytical approach we propose differs fundamentally from the classical one.  
18 First, we adopt a mechanistic perspective that tries to understand the individual heterogeneity  
19 of responses surrounding average probabilities. Second, we combine measures of association  
20 with measures of variance and discriminatory accuracy and stress the importance of  
21 evaluating not only the discriminatory accuracy of the individual level variables but also of  
22 the geographical boundaries used to define neighbourhoods in relation to the outcome under  
23 investigation. For this purpose what we denominated *general contextual effects* in multilevel  
24 regression analysis allows us to quantify the degree of clustering within neighbourhoods (i.e.,

1 the ICC) (3, 10) or, analogously, the discriminatory accuracy of using the boundaries of the  
2 neighbourhoods in the analysis (i.e., the AU-ROC) (32, 33). The existence of individual  
3 dependence within neighbourhoods is not only the *sine qua non* for applying statistical  
4 multilevel analyses but also the size of this dependence provides fundamental substantive  
5 information (1, 18).

### 6 *Strength and weaknesses*

7 Our current study tries to quantify the relevance of neighbourhoods in Malmö for  
8 understanding individual use of psychotropic drugs and choice of private vs public GP. We  
9 considered the simplest possible multilevel structure of individual nested within  
10 neighbourhoods as this is the most common design in neighbourhood and health studies.  
11 However, to constrain the study of contextual effects to a single geographical level (e.g.,  
12 SAMS areas) is certainly an extreme simplification (58). Individuals are likely to be  
13 simultaneously affected by multiple contexts at different scales across time (59-63).  
14 Nevertheless, the analytical approach we promote can be developed for more than two levels  
15 of analyses (e.g., individuals nested in households nested in neighbourhoods)(2) as well as for  
16 multiple membership and cross-classified multilevel structures (e.g., schools and  
17 neighbourhoods at different times in the life course) (18, 60, 64-66). However, adopting a  
18 pragmatic rather than academic perspective, straightforward multilevel analysis of  
19 heterogeneity that only considers individuals nested in neighbourhoods provides a better basis  
20 for informed decisions in public health than the simple ecological or spatial analyses of small  
21 area variation or classical multilevel analysis of contextual risk factors (2).

22 The identification of causal effects in observational epidemiology and, more specifically, in  
23 the study of neighbourhoods “effects” is a major problem. In our study, the underlying causal  
24 question was to know what would happen to an individual if she/he, *ceteris paribus*, moves to



1 another neighbourhood with a different context. Furthermore, we wanted to identify if any  
2 general effect was mediated by a specific variable informing the socioeconomic  
3 characteristics of the context (e.g., rich vs. poor neighbourhood). However, what “rich” and  
4 “poor” neighbourhood means is difficult to specify and it would need a deeper sociological  
5 analysis. In the adjusted analysis we only considered individual age, sex and income as our  
6 main purpose was to illustrate the methodology. Therefore, we cannot exclude the existence  
7 of omitted confounding factors. Nevertheless, in neighbourhood analyses it is always a caveat  
8 to distinguish between confounder and mediator variables as frequently a common cause of  
9 both place of residence and the health outcome may also be a mediator of the neighbourhood  
10 effect (for instance low income is associated to using psychotropic drugs and low income  
11 individuals may be segregated to poor neighbourhoods but, in turn, living in a poor  
12 neighbourhood may reduce the chances of increasing an individual’s income). Furthermore,  
13 there may be problems of extrapolation (i.e., making inferences beyond the range of the data,) since few rich individuals reside in poor neighbourhoods and vice versa, so the  
14 appropriateness of adjusting for individual income could be questioned. Finally, while some  
15 contextual effects may be caused by exogenous exposures (e.g., absence of public GPs in an  
16 area) other may be endogenous and emerge from the individual composition of the  
17 neighbourhood (e.g., switching all low and high income individuals to rich and low  
18 neighbourhood will also change the neighbourhood context). In general, drawing valid causal  
19 inferences in observational epidemiology is difficult and this is especially the case in  
20 neighbourhood and health studies (18, 67).

### 22 *Correspondence between the different measures used to estimate general contextual effects*

23 There is a clear correspondence between the ICC and the AU-ROC so when the ICC is high  
24 the AU-ROC is also high. However, the ICC is not influenced by the number of individuals at  
25 the neighbourhood since its calculation is based on the neighbourhood variance which, in

1 turn, is based on differences between neighbourhoods' averages and it is, therefore,  
2 standardized for neighbourhood size (i.e., the number of individuals in the neighbourhoods).  
3 On the other hand, the AU-ROC is based on the calculation of the TPF and FPF for different  
4 thresholds of the predicted probability. Since this predicted probability is an individual level  
5 variable, large clusters contribute with more individuals. Because of this difference, it could  
6 be possible to find a high ICC but a low AU-ROC if the number of individuals is relatively  
7 much larger in some neighbourhood than in others. This situation does not mean that the AU-  
8 ROC is a biased measure but, rather, it provides different and useful information. For  
9 instance, some large neighbourhoods could have a *high* proportion of individuals visiting a  
10 private GP and some small neighbourhoods could have a *low* proportion of individuals  
11 visiting a private GP. The ICC would be high indicating that neighbourhoods condition the  
12 individual choice of private versus public GP. However, the AU-ROC would be low  
13 expressing that most individuals have the same predicted risk, irrespective of whether they  
14 visit a private GP or not, and subsequently, that neighbourhoods, in the given context, do not  
15 discriminate with accuracy individuals that visit a private GP from those who do not.  
16 Otherwise, when neighbourhoods sizes are similar there is a clear correspondence between the  
17 ICC and the AU-ROC values (32, 33).

18 There is also a correspondence between the MOR and the ICC as both are monotone functions  
19 of the neighbourhood variance, and this correspondence makes the MOR a measure of general  
20 contextual effects. However, the MOR is a measure of probability and not of components of  
21 variance as the ICC. The MOR expresses the size of the heterogeneity between the  
22 neighbourhoods and the ICC the size of the clustering within neighbourhoods.

23 *The identification of the units of analysis*

1 In contextual epidemiology the individual units are obviously easy to recognize since each  
2 individual is delineated by the skin. However, this is not the case when it comes to identifying  
3 contextual units. For this purpose, we frequently use geographical and administrative  
4 boundaries delineating small areas such as neighbourhoods, blocks, census tracts, or even  
5 large territories such as states, counties or countries. We assume that these boundaries  
6 condition individual health over and above individual characteristics. Nevertheless, this  
7 assumption is rarely validated (3). The components of variance analysis and the use of  
8 measures of discriminatory accuracy help us to identify if the definition of neighbourhood we  
9 use actually captures a relevant context that influences the health outcome under  
10 investigation. Different neighbourhood definitions clearly have different relevance for the  
11 same outcome while the same neighbourhood definition may have different relevance for  
12 different outcomes.

### 13 *The “fixed effects approach” for the calculation of the neighbourhood AU-ROC*

14 An alternative to the use of the predicted neighbourhood random effects for the calculation of  
15 the AU-ROC is to include the neighbourhoods as fixed-effects dummy variables in a single  
16 level logistic regression (i.e., “fixed effects approach”). Using this alternative we obtained an  
17 AU-ROC (95% confidence interval) equal to 0.899 (0.891 – 0.899) for visiting a private vs a  
18 public GP, and equal to 0.634 (0.628 – 0.640) for use of psychotropic drugs which are very  
19 similar to those obtained from Model 2 (general contextual effects) of the multilevel  
20 regression analysis. The “fixed effects approach” provides a worthy strategy for a quick  
21 evaluation of general contextual effects and it does not require special software for multilevel  
22 analyses. However, the fixed effects approach prevents the further study of contextual level  
23 variables (e.g., neighbourhood low income). Besides, the model is not parsimonious. For  
24 instance in our study we would need to include 217 dummy variables for the 218  
25 neighbourhood’s. The fixed effects approach is also susceptible to biased estimation by

1 random noise if the number of individuals in some neighbourhood's is small, while the  
2 prediction of neighbourhood effects in multilevel regression is based on empirical Bayes  
3 prediction which protects against this bias by being a so-called shrinkage estimator (12). More  
4 fundamentally, the "fixed-effects" logistic model provides inconsistent estimates of the  
5 regression coefficients when the number of individuals per neighbourhood is low due to what  
6 is known as the *incidental parameter problem* (68) in which case it may be more appropriate  
7 to consider conditional logistic regression.

## 8 *Summary*

9 In observational epidemiology of neighbourhoods and health, there are many unsolved  
10 problems concerning the identification of the relevant contexts for specific health outcomes.  
11 There are also specific difficulties for drawing causal inferences. Furthermore, in common  
12 with other fields in epidemiology, the traditional approach in multilevel analysis of  
13 neighbourhood and health maintains a probabilistic approach focused on the analyses of  
14 associations and considers the analyses of variance as a secondary task (56). However, some  
15 authors, including ourselves (2, 5, 7, 8, 28, 59, 60, 62, 63, 69, 70) stress that the simultaneous  
16 consideration of both measures of association and of variance is fundamental in epidemiology  
17 (18). The present study clearly illustrates that the bare analysis of measures of association is  
18 insufficient for understanding contextual effects on individual health. In fact, naïve  
19 interpretations of measures of associations and considering only the statistical "significance"  
20 of the neighbourhood variance is misleading and gives an inappropriate base for decision  
21 makers. Our study provides concepts and innovative analytical approaches like the use of the  
22 AU-ROC that allow improved multilevel analysis of neighbourhood and health.

23 Finally, performing and interpreting multilevel regression analyses is an interesting task and  
24 many technical and conceptual advances have been performed during the last three decades.

1 However, in the end, the quantitative analysis of contextual influences on individual health  
2 may well be unsatisfactory no matter how sophisticated the statistical techniques. Public  
3 health would benefit from a stronger humanistic approach that combines multilevel regression  
4 and qualitative analyses (71, 72). In any case, epidemiological studies should always provide  
5 measures of discriminatory accuracy like the AU-ROC side by side with measures of  
6 association.

### 7 Acknowledgements

8 Funding: This work was supported by the Swedish Research Council (PI: Merlo #2013-  
9 2484) and by Research funds of the Faculty of Medicine at the Lund University.

10

11

## 1 References

- 2 1. Merlo J. Multilevel analytical approaches in social epidemiology: measures of health variation  
3 compared with traditional measures of association. *J Epidemiol Community Health*.  
4 2003;57(8):550-2.
- 5 2. Merlo J, Viciano-Fernandez FJ, Ramiro-Farinas D, Research Group of Longitudinal Database of  
6 Andalusian P. Bringing the individual back to small-area variation studies: a multilevel analysis of  
7 all-cause mortality in Andalusia, Spain. *Soc Sci Med*. 2012;75(8):1477-87.
- 8 3. Merlo J, Ohlsson H, Lynch KF, Chaix B, Subramanian SV. Individual and collective bodies: using  
9 measures of variance and association in contextual epidemiology. *J Epidemiol Community*  
10 *Health*. 2009;63(12):1043-8.
- 11 4. Duncan C, Jones K, Moon G. Do places matter? A multi-level analysis of regional variations in  
12 health-related behaviour in Britain. *Soc Sci Med*. 1993;37(6):725-33.
- 13 5. Boyle MH, Willms JD. Place effects for areas defined by administrative boundaries.  
14 *AmJEpidemiol*. 1999;149(6):577-85.
- 15 6. Merlo J, Ostergren PO, Hagberg O, Lindstrom M, Lindgren A, Melander A, et al. Diastolic blood  
16 pressure and area of residence: multilevel versus ecological analysis of social inequity. *J*  
17 *Epidemiol Community Health*. 2001;55(11):791-8.
- 18 7. Merlo J, Asplund K, Lynch J, Rastam L, Dobson A. Population effects on individual systolic blood  
19 pressure: a multilevel analysis of the World Health Organization MONICA Project. *Am J*  
20 *Epidemiol*. 2004;159(12):1168-79.
- 21 8. Clarke P, Wheaton B. Addressing Data Sparseness in Contextual Population Research: Using  
22 Cluster Analysis to Create Synthetic Neighborhoods. *Sociological Methods Research*.  
23 2007;35:311 - 51.
- 24 9. Riva M, Gauvin L, Barnett TA. Toward the next generation of research into small area effects on  
25 health: a synthesis of multilevel investigations published since July 1998. *J Epidemiol Community*  
26 *Health*. 2007;61(10):853-61.
- 27 10. Merlo J, Chaix B, Ohlsson H, Beckman A, Johnell K, Hjerpe P, et al. A brief conceptual tutorial of  
28 multilevel analysis in social epidemiology: using measures of clustering in multilevel logistic  
29 regression to investigate contextual phenomena. *J Epidemiol Community Health*.  
30 2006;60(4):290-7.
- 31 11. Merlo J, Chaix B, Yang M, Lynch J, Rastam L. A brief conceptual tutorial on multilevel analysis in  
32 social epidemiology: interpreting neighbourhood differences and the effect of neighbourhood  
33 characteristics on individual health. *J Epidemiol Community Health*. 2005;59(12):1022-8.
- 34 12. Merlo J, Chaix B, Yang M, Lynch J, Rastam L. A brief conceptual tutorial of multilevel analysis in  
35 social epidemiology: linking the statistical concept of clustering to the idea of contextual  
36 phenomenon. *J Epidemiol Community Health*. 2005;59(6):443-9.
- 37 13. Merlo J, Yang M, Chaix B, Lynch J, Rastam L. A brief conceptual tutorial on multilevel analysis in  
38 social epidemiology: investigating contextual phenomena in different groups of people. *J*  
39 *Epidemiol Community Health*. 2005;59(9):729-36.
- 40 14. Petronis KR, Anthony JC. A different kind of contextual effect: geographical clustering of cocaine  
41 incidence in the USA. *J Epidemiol Community Health*. 2003;57(11):893-900.
- 42 15. Rose G. Sick individuals and sick populations. 1985. *Bull World Health Organ*. 2001;79(10):990-6.
- 43 16. Ibanez B, Librero J, Bernal-Delgado E, Peiro S, Lopez-Valcarcel BG, Martinez N, et al. Is there  
44 much variation in variation? Revisiting statistics of small area variation in health services  
45 research. *BMC health services research*. 2009;9:60.
- 46 17. Sundquist K, Winkleby M, Ahlen H, Johansson SE. Neighborhood socioeconomic environment  
47 and incidence of coronary heart disease: a follow-up study of 25,319 women and men in  
48 Sweden. *Am J Epidemiol*. 2004;159(7):655-62.

- 1 18. Merlo J. Invited commentary: multilevel analysis of individual heterogeneity—a fundamental  
2 critique of the current probabilistic risk factor epidemiology. *American Journal of Epidemiology*.  
3 2014;180(2):208-12.
- 4 19. Pepe MS, Janes H, Longton G, Leisenring W, Newcomb P. Limitations of the odds ratio in gauging  
5 the performance of a diagnostic, prognostic, or screening marker. *Am J Epidemiol*.  
6 2004;159(9):882-90.
- 7 20. Pencina MJ, D'Agostino RB, Pencina KM, Janssens AC, Greenland P. Interpreting incremental  
8 value of markers added to risk prediction models. *Am J Epidemiol*. 2012;176(6):473-81.
- 9 21. Pencina MJ, D'Agostino RB, Sr., Steyerberg EW. Extensions of net reclassification improvement  
10 calculations to measure usefulness of new biomarkers. *Stat Med*. 2011;30(1):11-21.
- 11 22. Pencina MJ, D'Agostino RB, Sr., D'Agostino RB, Jr., Vasan RS. Evaluating the added predictive  
12 ability of a new marker: From area under the ROC curve to reclassification and beyond. *Statistics*  
13 *in Medicine*. 2008;27(2):157-72.
- 14 23. Pepe MS. Problems with risk reclassification methods for evaluating prediction models. *Am J*  
15 *Epidemiol*. 2011;173(11):1327-35.
- 16 24. Hidden J, Gerds T. Evaluating the impact of novel biomarkers: Do not rely on IDI and NRI.  
17 Department of Biostatistics, University of Copenhagen, Denmark. 2012;Research Report 12/08.
- 18 25. Goldstein H, Browne W, Rasbash J. Partitioning variation in generalised linear multilevel models.  
19 *Understanding Statistics*. 2002;1:223-32.
- 20 26. Browne WJ, Subramanian SV, Jones K, Goldstein H. Variance partitioning in multilevel logistic  
21 models that exhibit overdispersion. *Journal of the Royal Statistical Society: Series A (Statistics in*  
22 *Society)*. 2005;168(3):599-613.
- 23 27. Li J, Gray BR, Bates DM. An Empirical Study of Statistical Properties of Variance Partition  
24 Coefficients for Multi-Level Logistic Regression Models. *Communications in Statistics -*  
25 *Simulation and Computation*. 2008;37:2010–26.
- 26 28. Larsen K, Merlo J. Appropriate assessment of neighborhood effects on individual health:  
27 integrating random and fixed effects in multilevel logistic regression. *Am J Epidemiol*.  
28 2005;161(1):81-8.
- 29 29. Larsen K, Petersen JH, Budtz-Jorgensen E, Endahl L. Interpreting parameters in the logistic  
30 regression model with random effects. *Biometrics*. 2000;56(3):909-14.
- 31 30. Bennett B. Use of the tetrachoric correlation model in assessing clinical tests. *Biometrical*  
32 *Journal*. 1980;22(4):335–8.
- 33 31. Lorenzo-Seva U, Ferrando PJ. TETRA-COM: a comprehensive SPSS program for estimating the  
34 tetrachoric correlation. *Behavior research methods*. 2012;44(4):1191-6.
- 35 32. Wagner P, Merlo J. Measures of discriminatory accuracy in multilevel analysis. *European journal*  
36 *of epidemiology*. 2013;28(1, Supplement):135.
- 37 33. Wagner P, Merlo J. Discriminatory accuracy of a random effect in multilevel logistic regression.  
38 20th IEA World Congress of Epidemiology (WCE2014). 2014.
- 39 34. Wettermark B, Hammar N, Fored CM, Leimanis A, Otterblad Olausson P, Bergman U, et al. The  
40 new Swedish Prescribed Drug Register—opportunities for pharmacoepidemiological research  
41 and experience from the first six months. *Pharmacoepidemiology and drug safety*.  
42 2007;16(7):726-35.
- 43 35. WHO Collaborating Centre for Drug Statistics Methodology. ATC/DDD Index. Available from:  
44 [http://www.hoccno/atc\\_ddd\\_index/](http://www.hoccno/atc_ddd_index/). 2013.
- 45 36. Sweden S. Product catalogue. Statistics Sweden's Market Profiles.  
46 2014;<http://www.scb.se/marketprofiles/>.
- 47 37. Leckie G, Goldstein H. Understanding Uncertainty in School League Tables. *Fiscal Studies*.  
48 2011;DOI: 10.1111/j.1475-5890.2011.00133.
- 49 38. Leckie G, Goldstein H. The limitations of using school league tables to inform school choice.  
50 *Journal of the Royal Statistical Society: Series A (Statistics in Society)*, . 2009(172):835-51.

- 1 39. Leckie G, Goldstein H. A note on "The limitations of using school league tables to inform school  
2 choice". *Journal of the Royal Statistical Society: Series A (Statistics in Society)*, . 2011(174):833-  
3 6.
- 4 40. Browne WJ. MCMC Estimation in MLwiN (Version 2.13) Centre for Multilevel Modelling,  
5 University of Bristol <http://www.bristol.ac.uk/cmm/software/mlwin/download/mcmc-printpdf>.  
6 2009;Downloaded, 27 Mars 2014.
- 7 41. Spiegelhalter DJ, Best N, Carlin BP, Linde AV. Bayesian measures of model complexity and fit.  
8 *Journal of the Royal Statistical Society Series C, Applied statistics*. 2002;64:583-639.
- 9 42. Lunn D, Jackson C, Best N, Thomas A, Spiegelhalter D. The BUGS book: A practical introduction  
10 to Bayesian analysis. . Boca Raton, FL: Chapman & Hall/CRC Texts in Statistical Science. 2012.
- 11 43. Yang M, Eldridge S, Merlo J. Multilevel survival analysis of health inequalities in life expectancy.  
12 *International journal for equity in health*. 2009;8:31.
- 13 44. Merlo J, Ohlsson H, Chaix B, Lichtenstein P, Kawachi I, Subramanian SV. Revisiting causal  
14 neighborhood effects on individual ischemic heart disease risk: a quasi-experimental multilevel  
15 analysis among Swedish sibilings. *Soc Sci Med*. 2013;76(1):39-46.
- 16 45. Mulinari S, Juárez S, Wagner P, Merlo J. Does maternal country of birth matter for  
17 understanding offspring's birthweight? A multilevel analysis of individual heterogeneity in  
18 Sweden. . *PLOS-ONE* (in press). 2015.
- 19 46. Maas CJM, Hox JJ. The influence of violations of assumptions on multilevel parameter estimates  
20 and their standar errors. *Computational statistics & data analysis*. 2004;46:427-40.
- 21 47. Goldstein H, Noden P. Modelling social segregation. *Oxford Review of Education*,.  
22 2003;29(2):225-37.
- 23 48. Leckie G, Goldstein H. A multilevel modelling approach to measuring changing patterns of ethnic  
24 composition and segregation among London secondary schools, 2001-2010. *Journal of the Royal  
25 Statistical Society: Series A (Statistics in Society)*, . 2015;178:405-24.
- 26 49. Leckie G, Pillinger R, Jones K, Goldstein H. Multilevel Modeling of Social Segregation. *JOURNAL  
27 OF EDUCATIONAL AND BEHAVIORAL STATISTICS* 2012;37 (1):3-30.
- 28 50. Johnell K, Merlo J, Lynch J, Blennow G. Neighbourhood social participation and women's use of  
29 anxiolytic-hypnotic drugs: a multilevel analysis. *J Epidemiol Community Health*. 2004;58(1):59-  
30 64.
- 31 51. Collaboration. Farmakoterapi vid ångest – Behandlingsrekommendation. Information från  
32 Läkemiddelsverket 4:2006, Sweden. 2006.
- 33 52. Hälso- och sjukvårdslag. 1982:763.  
34 <http://www.riksdagen.se/webbnav/index.aspx?nid=3911&bet=1982:763>, (1982).
- 35 53. Beckman A. Country of birth and socioeconomic disparities in utilisation of health care and  
36 disability pension – a multilevel approach. [Thesis doctoral]. Malmö Lunds University; 2005.
- 37 54. Veblen T. *The Theory of the Leisure Class*. Baltimore: Penguin Books; 1994.
- 38 55. Pickett KE, Pearl M. Multilevel analyses of neighbourhood socioeconomic context and health  
39 outcomes: a critical review. *J Epidemiol Community Health*. 2001;55(2):111-22.
- 40 56. Diez Roux AV. Next steps in understanding the multilevel determinants of health. *J Epidemiol  
41 Community Health* 1470-2738 (Electronic). 2008;62(11):957-9.
- 42 57. Merlo J, Wagner P. The tyranny of the averages and the indiscriminate use of risk factors in  
43 public health: a call for revolution. *European journal of epidemiology*. 2013;28(1,  
44 Supplement):148.
- 45 58. Mitchell R. Multilevel modeling might not be the answer. *Environ Plan A*. 2001;33:1357-60.
- 46 59. Rasbash J, Leckie G, Pillinger R, Jenkins J. Children's educational progress: partitioning family,  
47 school and area effects. *Journal of the Royal Statistical Society: Series A (Statistics in Society)*.  
48 2010;173(3):657-82.
- 49 60. Leckie G. The complexity of school and neighbourhood effects and movements of pupils on  
50 school differences in models of educational achievement. *Journal of the Royal Statistical Society:  
51 Series A (Statistics in Society)*. 2009;172(537-554).



- 1 61. Morenoff JD. Neighborhood mechanisms and the spatial dynamics of birth weight. *AJS*.  
2 2003;108(5):976-1017.
- 3 62. Ohlsson H, Merlo J. Place effects for areas defined by administrative boundaries: a life course  
4 analysis of mortality and cause specific morbidity in Scania, Sweden. *Soc Sci Med*.  
5 2011;73(8):1145-51.
- 6 63. Sariaslan A, Langstrom N, D'Onofrio B, Hallqvist J, Franck J, Lichtenstein P. The impact of  
7 neighbourhood deprivation on adolescent violent criminality and substance misuse: a  
8 longitudinal, quasi-experimental study of the total Swedish population. *International Journal of*  
9 *Epidemiology*. 2013;42(4):1057-66.
- 10 64. Leckie G. Cross-classified Multilevel Models - Concepts. LEMMA VLE Module 12, 1-60. . 2013.
- 11 65. Leckie G. Multiple Membership Multilevel Models - Concepts. LEMMA VLE Module 13, 1-61.  
12 2013.
- 13 66. Browne WJ, Goldstein H, Rasbash J. Multiple membership multiple classification (MMMC)  
14 models. *Statistical Modelling*. 2001;1(2):103-24.
- 15 67. Oakes JM. The (mis)estimation of neighborhood effects: causal inference for a practicable social  
16 epidemiology. *Soc Sci Med*. 2004;58(10):1929-52.
- 17 68. Neyman J, Scott E L. Consistent estimates based on partially consistent observations.  
18 *Econometrica* 16, 1–32. *Econometrica* 1948;16:1-32.
- 19 69. Dundas R, Leyland AL, Macintyre S. Early life school, neighbourhood and family influences on  
20 adult health: a multilevel cross-classified analysis of the Aberdeen Children of the 1950s study.  
21 *American Journal of Epidemiology*. 2014;AJE-00606-2013.R5.
- 22 70. Leyland AH, Naess O. The effect of area of residence over the life course on subsequent  
23 mortality. *Journal of the Royal Statistical Society Series A*. 2009;172(3):555-78.
- 24 71. Cummins S, Curtis S, Diez-Roux AV, Macintyre S. Understanding and representing 'place' in  
25 health research: A relational approach. *Soc Sci Med*. 2007;65(9):1825-38.
- 26 72. Macintyre S, Ellaway A, Cummins S. Place effects on health: how can we conceptualise,  
27 operationalise and measure them? *Soc Sci Med*. 2002;55(1):125-39.

28

Figure

[Click here to download Figure: Fig. 1.TIF](#)

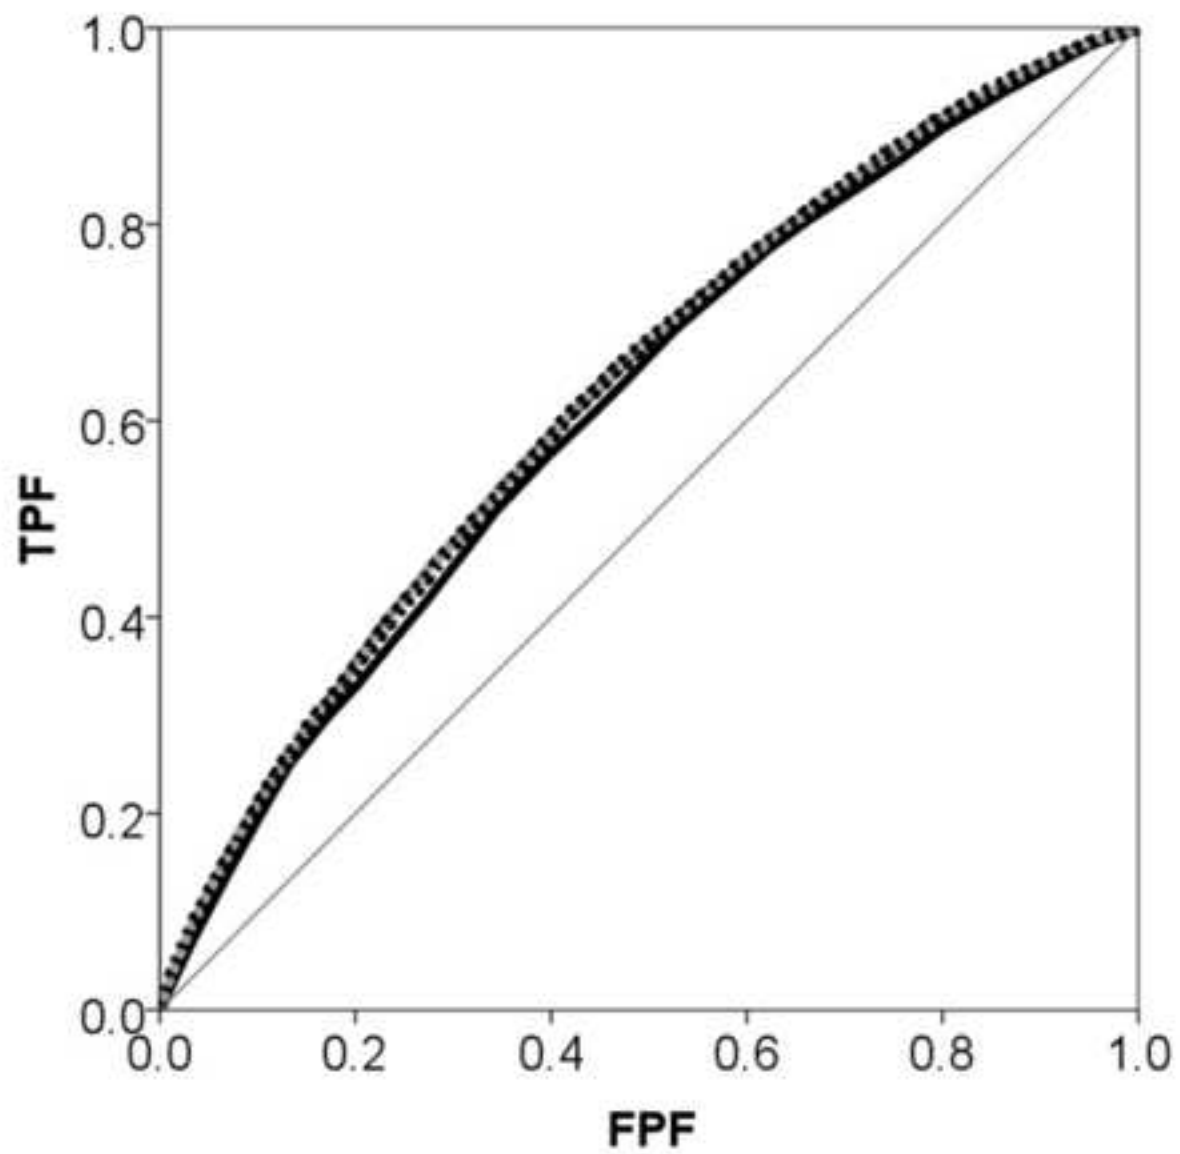

Figure 1

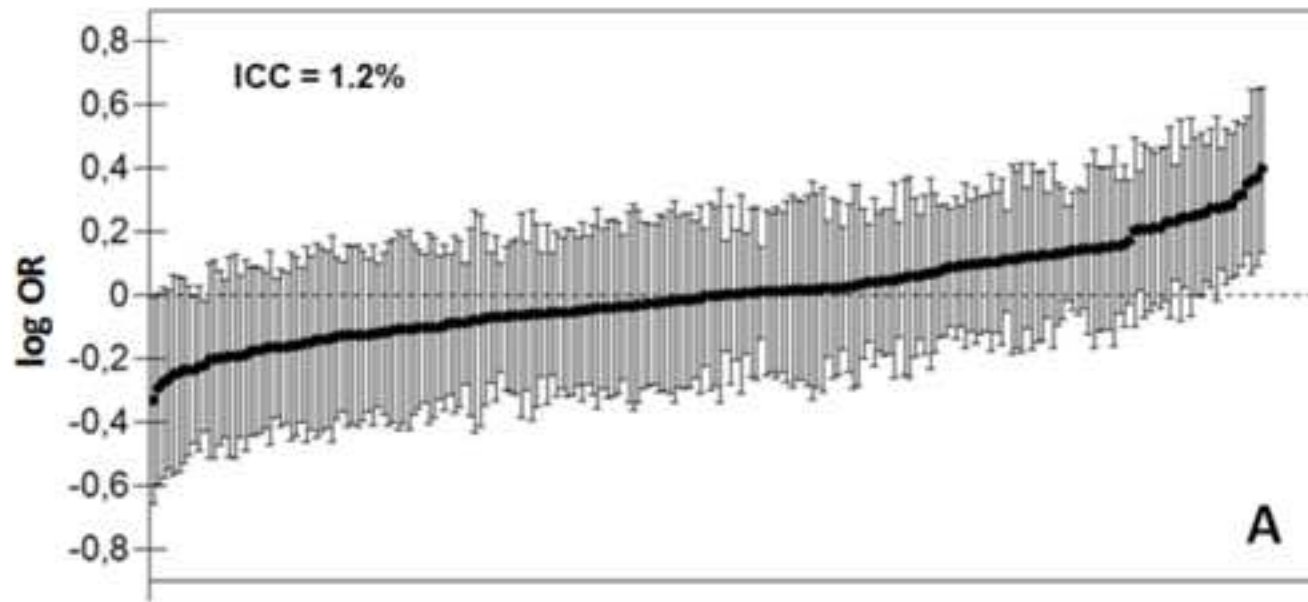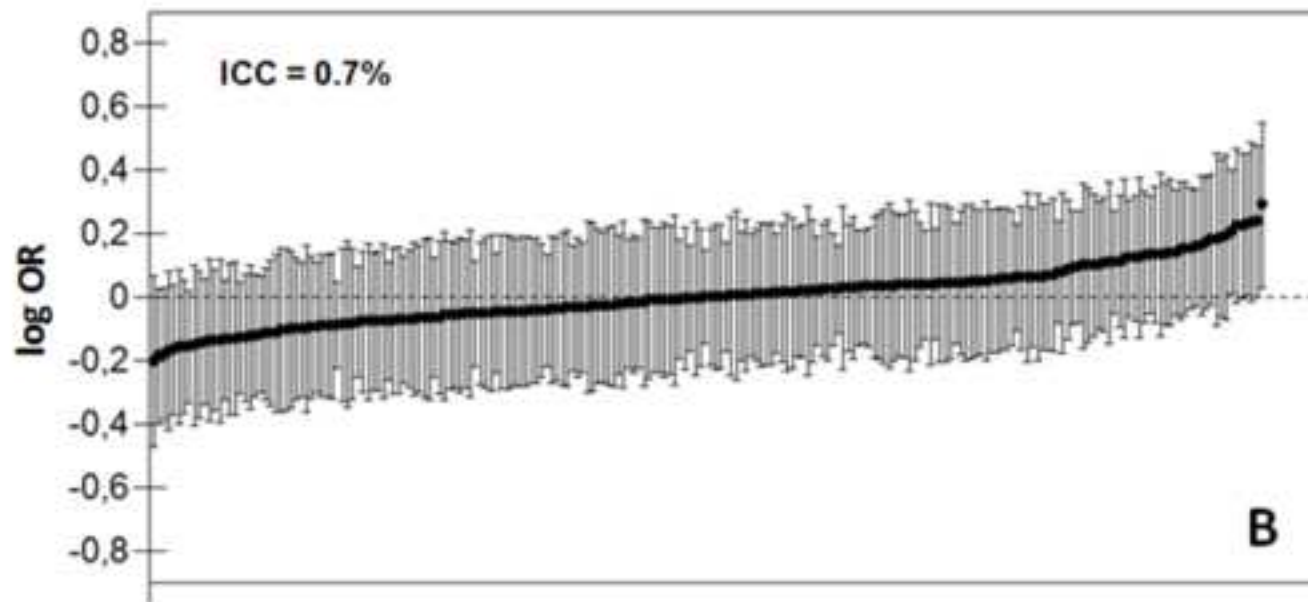

Figure 2

Figure

[Click here to download Figure: Fig. 3.TIF](#)

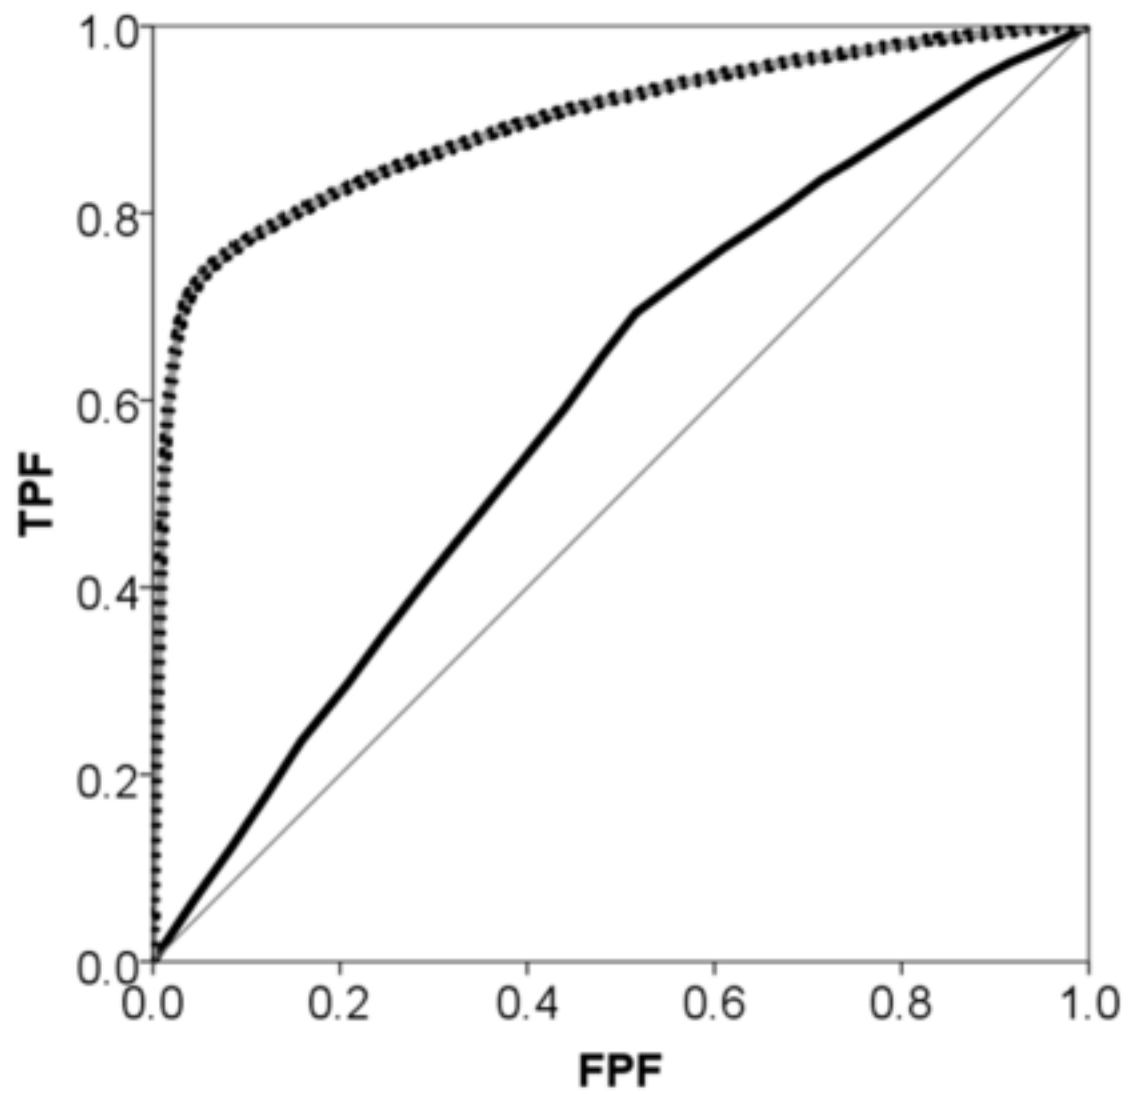

**Figure 3**

Figure

[Click here to download Figure: Fig. 4.TIF](#)

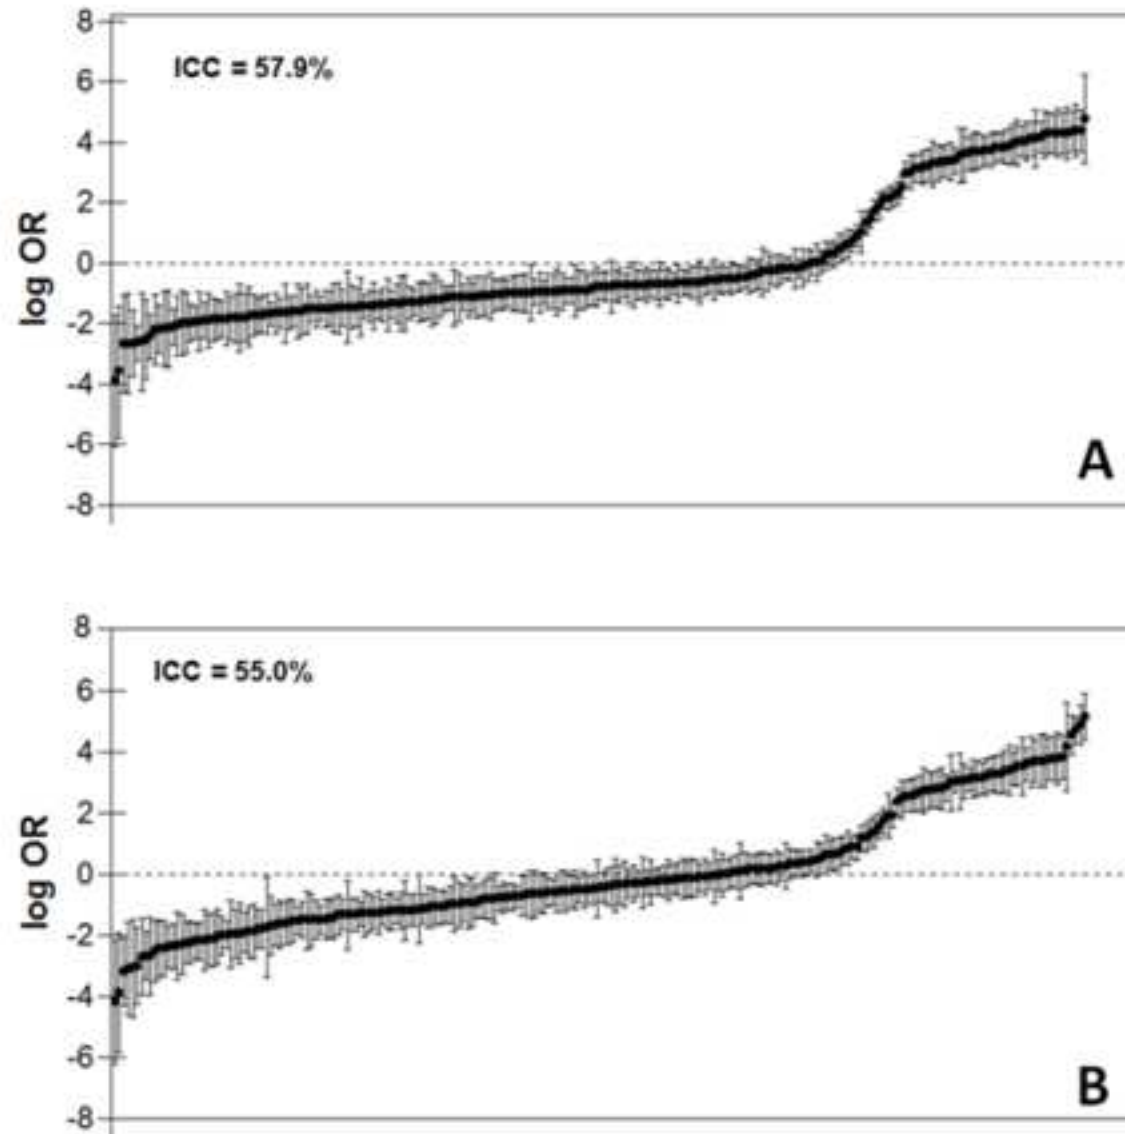

Figure 4

[Click here to download Supporting Information: stata.do](#)

[Click here to download Supporting Information: data\\_43291\\_Stata.dta](#)

[Click here to download Supporting Information: data\\_43291\\_Excel.xlsx](#)



[Click here to download Supporting Information: data\\_43291\\_spss.sav](#)

[Click here to download Supporting Information: data\\_43291\\_MLwiN.wsz](#)

[Click here to download Supporting Information: GP\\_\\_m1.wsz](#)

[Click here to download Supporting Information: GP\\_\\_m2.wsz](#)

[Click here to download Supporting Information: GP\\_\\_m3.wsz](#)

[Click here to download Supporting Information: psy\\_\\_m1.wsz](#)

[Click here to download Supporting Information: psy\\_\\_m2.wsz](#)

[Click here to download Supporting Information: psy\\_\\_m3.wsz](#)



Supporting Information

[Click here to download Supporting Information: MOR-IOR-POOR-ICC-PCV.xls](#)
